# Supplementary material
Source: PubMed Central journal article supplement (PMC3708368)
Supplement: supp_M037952_jlr.M037952-1.pdf [file supp_M037952_jlr.M037952-1.pdf]

**Supplementary Table I.** List of internal standards used in LC-MS/MS

| <b>Lipid class</b> | <b>Internal standards used</b>          | <b>Concentration of internal standards in autosampler vial</b> |
|--------------------|-----------------------------------------|----------------------------------------------------------------|
| PS                 | 12:0/13:0 14:1/17:0 17:0/20:4 21:0/22:6 | 4 $\mu$ M                                                      |
| SM                 | LM 6002 SP mix (10 compounds)           | 1 $\mu$ M                                                      |
| PI                 | 12:0/13:0 14:1/17:0 17:0/20:4 21:0/22:6 | 4 $\mu$ M                                                      |
| LPC                | 17:0                                    | 1 $\mu$ M                                                      |
| PE                 | 12:0/13:0 14:1/17:0 17:0/20:4 21:0/22:6 | 2 $\mu$ M                                                      |
| PC                 | 12:0/13:0 14:1/17:0 17:0/20:4 21:0/22:6 | 1 $\mu$ M                                                      |
| DG                 | LM 6001 DG mix (9 compounds)            | 4 $\mu$ M                                                      |
| TG                 | LM 6000 TG mix (9 compounds)            | 1 $\mu$ M                                                      |

**Supplementary Table II.** PC1 and PC2 loadings for TG, DG and PC species

| TG PC1+  |        | TG PC1- |           | TG PC2+  |          | TG PC2-  |         |
|----------|--------|---------|-----------|----------|----------|----------|---------|
| TG 54:5  | 0.33   | TG 52:2 | -0.6189   | TG 52:4  | 0.6476   | TG 56:7  | -0.4071 |
| TG 54:6  | 0.2585 | TG 52:3 | -0.5773   | TG 52:5  | 0.2545   | TG 56:8  | -0.3065 |
| TG 54:4  | 0.1927 | TG 52:4 | -0.1826   | TG 54:5  | 0.2417   | TG 56:6  | -0.1999 |
| TG 56:8  | 0.1199 | TG 54:2 | -0.0213   | TG 54:4  | 0.2067   | TG 58:8  | -0.1617 |
| TG 56:7  | 0.0899 | TG 52:5 | -0.018    | TG 54:2  | 0.1104   | TG 58:7  | -0.1306 |
| TG 54:7  | 0.0749 | TG 56:5 | -0.0059   | TG 54:7  | 0.0844   | TG 52:2  | -0.1237 |
| TG 58:10 | 0.0436 | TG 52:1 | -0.0057   | TG 54:6  | 0.0707   | TG 58:9  | -0.086  |
| TG 58:9  | 0.0374 | TG 42:2 | -0.004    | TG 52:6  | 0.0382   | TG 58:6  | -0.0698 |
| TG 56:9  | 0.0319 | TG 56:2 | -0.0034   | TG 50:4  | 0.0342   | TG 56:5  | -0.0657 |
| TG 50:4  | 0.0269 | TG 50:1 | -0.0028   | TG 50:2  | 0.0309   | TG 58:10 | -0.0514 |
| TG 54:3  | 0.0269 | TG 42:1 | -0.0026   | TG 56:4  | 0.029    | TG 60:8  | -0.0346 |
| TG 52:6  | 0.0217 | TG 54:1 | -0.0025   | TG 54:3  | 0.0279   | TG 60:9  | -0.0331 |
| TG 54:8  | 0.0179 | TG 44:4 | -0.0021   | TG 52:3  | 0.0267   | TG 60:10 | -0.0311 |
| TG 58:8  | 0.0171 | TG 46:6 | -0.002    | TG 56:3  | 0.0215   | TG 60:12 | -0.0296 |
| TG 50:5  | 0.0155 | TG 58:5 | -0.0014   | TG 54:8  | 0.0163   | TG 60:11 | -0.0199 |
| TG 48:3  | 0.0154 | TG 34:1 | -0.0011   | TG 50:5  | 0.0157   | TG 58:5  | -0.0189 |
| TG 50:2  | 0.014  | TG 60:9 | -0.0011   | TG 52:7  | 0.009    | TG 60:7  | -0.017  |
| TG 50:3  | 0.013  | TG 34:2 | -9.00E-04 | TG 50:3  | 0.0067   | TG 62:12 | -0.012  |
| TG 56:4  | 0.0127 | TG 56:3 | -8.00E-04 | TG 48:3  | 0.004    | TG 48:1  | -0.0106 |
| TG 56:6  | 0.0126 | TG 60:8 | -7.00E-04 | TG 56:9  | 0.0031   | TG 62:11 | -0.0103 |
| TG 48:2  | 0.0112 | TG 50:0 | -6.00E-04 | TG 56:10 | 0.0025   | TG 42:2  | -0.0093 |
| TG 48:4  | 0.0103 | TG 60:7 | -6.00E-04 | TG 50:1  | 0.0024   | TG 48:2  | -0.007  |
| TG 52:7  | 0.0082 | TG 40:1 | -5.00E-04 | TG 54:9  | 0.0023   | TG 60:6  | -0.0051 |
| TG 46:2  | 0.0069 | TG 44:3 | -5.00E-04 | TG 50:6  | 0.0022   | TG 42:1  | -0.0047 |
| TG 58:11 | 0.0059 | TG 46:5 | -5.00E-04 | TG 48:4  | 0.0015   | TG 46:2  | -0.0047 |
| TG 60:12 | 0.0059 | TG 58:4 | -5.00E-04 | TG 46:3  | 0.0013   | TG 44:4  | -0.0038 |
| TG 50:6  | 0.0052 | TG 42:3 | -4.00E-04 | TG 58:4  | 8.00E-04 | TG 56:2  | -0.0038 |
| TG 46:3  | 0.0044 | TG 58:2 | -4.00E-04 | TG 52:8  | 7.00E-04 | TG 46:6  | -0.0036 |
| TG 60:11 | 0.0042 | TG 32:0 | -3.00E-04 | TG 48:5  | 6.00E-04 | TG 58:11 | -0.0036 |
| TG 56:10 | 0.004  | TG 36:4 | -3.00E-04 | TG 58:3  | 6.00E-04 | TG 52:1  | -0.0034 |
| TG 58:7  | 0.0031 | TG 40:0 | -2.00E-04 | TG 50:7  | 4.00E-04 | TG 54:1  | -0.0029 |
| TG 48:5  | 0.0027 | TG 44:5 | -2.00E-04 | TG 56:11 | 3.00E-04 | TG 62:13 | -0.0029 |
| TG 54:9  | 0.0026 | TG 48:7 | -2.00E-04 | TG 48:6  | 2.00E-04 | TG 46:1  | -0.0024 |
| TG 52:8  | 0.0019 | TG 32:1 | -1.00E-04 | TG 54:10 | 2.00E-04 | TG 62:14 | -0.0019 |
| TG 48:0  | 0.0017 | TG 34:0 | -1.00E-04 | TG 60:5  | 1.00E-04 | TG 46:4  | -0.0018 |
| TG 46:1  | 0.0014 | TG 36:1 | -1.00E-04 | TG 36:2  | 0        | TG 46:5  | -0.0018 |
| TG 58:6  | 0.0013 | TG 36:2 | -1.00E-04 | TG 58:2  | 0        | TG 44:2  | -0.0016 |
| TG 50:7  | 0.0012 | TG 44:1 | -1.00E-04 | TG 58:12 | 0        | TG 44:3  | -0.0016 |

TG continued

|          |          |         |           |          |           |
|----------|----------|---------|-----------|----------|-----------|
| TG 62:12 | 0.001    | TG 58:3 | -1.00E-04 | TG 34:1  | -0.0015   |
| TG 62:13 | 0.001    | TG 60:5 | -1.00E-04 | TG 34:2  | -0.0013   |
| TG 60:10 | 7.00E-04 | TG 60:6 | -1.00E-04 | TG 60:13 | -0.001    |
| TG 48:6  | 6.00E-04 |         |           | TG 44:1  | -7.00E-04 |
| TG 58:12 | 6.00E-04 |         |           | TG 48:0  | -7.00E-04 |
| TG 56:11 | 5.00E-04 |         |           | TG 40:1  | -6.00E-04 |
| TG 60:13 | 5.00E-04 |         |           | TG 42:3  | -6.00E-04 |
| TG 62:14 | 5.00E-04 |         |           | TG 48:7  | -6.00E-04 |
| TG 46:4  | 4.00E-04 |         |           | TG 36:4  | -5.00E-04 |
| TG 48:1  | 4.00E-04 |         |           | TG 50:0  | -5.00E-04 |
| TG 54:10 | 3.00E-04 |         |           | TG 32:0  | -4.00E-04 |
| TG 62:11 | 3.00E-04 |         |           | TG 40:0  | -4.00E-04 |
| TG 44:2  | 1.00E-04 |         |           | TG 44:5  | -3.00E-04 |
| TG 38:1  | 0        |         |           | TG 32:1  | -2.00E-04 |
| TG 40:2  | 0        |         |           | TG 34:0  | -1.00E-04 |
|          |          |         |           | TG 40:2  | -1.00E-04 |

DG PC1+

DG PC1-

DG PC2+

DG PC2-

|         |          |         |         |         |        |         |         |
|---------|----------|---------|---------|---------|--------|---------|---------|
| DG 36:3 | 0.649    | DG 34:1 | -0.5321 | DG 38:4 | 0.2713 | DG 34:2 | -0.7905 |
| DG 36:4 | 0.3635   | DG 34:2 | -0.3039 | DG 36:2 | 0.1885 | DG 36:3 | -0.3844 |
| DG 38:6 | 0.0967   | DG 38:4 | -0.2034 | DG 38:3 | 0.1782 | DG 34:1 | -0.1134 |
| DG 40:7 | 0.065    | DG 40:4 | -0.0833 | DG 40:7 | 0.1491 | DG 34:3 | -0.0406 |
| DG 40:6 | 0.0368   | DG 36:2 | -0.0729 | DG 38:5 | 0.1108 | DG 32:1 | -0.0224 |
| DG 40:5 | 0.0233   | DG 32:1 | -0.0271 | DG 40:4 | 0.0941 | DG 34:4 | -0.0165 |
| DG 38:5 | 0.0126   | DG 36:1 | -0.0211 | DG 38:2 | 0.0902 | DG 40:5 | -0.0155 |
| DG 34:4 | 0.0116   | DG 34:3 | -0.0177 | DG 38:6 | 0.0817 | DG 32:2 | -0.0124 |
| DG 36:5 | 0.0086   | DG 38:3 | -0.0084 | DG 40:8 | 0.0708 | DG 36:5 | -0.0065 |
| DG 40:8 | 0.0071   | DG 34:0 | -0.0068 | DG 36:1 | 0.0634 | DG 38:7 | -0.0019 |
| DG 32:0 | 0.004    | DG 38:2 | -0.0031 | DG 34:0 | 0.0486 | DG 34:5 | -0.0012 |
| DG 34:5 | 0.0018   | DG 32:2 | -0.0029 | DG 36:4 | 0.0222 |         |         |
| DG 38:1 | 0.0018   |         |         | DG 40:6 | 0.0218 |         |         |
| DG 38:7 | 9.00E-04 |         |         | DG 32:0 | 0.0124 |         |         |
|         |          |         |         | DG 38:1 | 0.002  |         |         |

PC PC1+

PC PC1-

PC PC2+

PC PC2-

|         |        |         |         |         |        |         |         |
|---------|--------|---------|---------|---------|--------|---------|---------|
| PC 34:2 | 0.8788 | PC 38:4 | -0.3532 | PC 38:4 | 0.4944 | PC 38:6 | -0.7562 |
| PC 34:1 | 0.0721 | PC 36:2 | -0.2754 | PC 36:4 | 0.2931 | PC 34:1 | -0.1679 |
| PC 34:3 | 0.0193 | PC 38:5 | -0.0983 | PC 34:2 | 0.1695 | PC 40:6 | -0.1051 |

PC continued

---

|         |        |         |           |         |        |         |         |
|---------|--------|---------|-----------|---------|--------|---------|---------|
| PC 40:8 | 0.0123 | PC 38:3 | -0.0863   | PC 38:5 | 0.0796 | PC 36:2 | -0.0972 |
| PC 36:5 | 0.0071 | PC 36:3 | -0.0345   | PC 40:8 | 0.079  | PC 36:3 | -0.0393 |
| PC 36:4 | 0.0058 | PC 40:7 | -0.0288   | PC 36:5 | 0.065  | PC 34:3 | -0.0265 |
|         |        | PC 36:1 | -0.0261   | PC 40:5 | 0.0266 | PC 38:3 | -0.011  |
|         |        | PC 40:6 | -0.0253   | PC 36:1 | 0.0146 | PC 32:1 | -0.0108 |
|         |        | PC 32:0 | -0.0165   | PC 32:0 | 0.0073 | PC 40:7 | -0.0079 |
|         |        | PC 38:6 | -0.0157   | PC 38:7 | 0.0072 | PC 34:4 | -0.0061 |
|         |        | PC 40:5 | -0.0139   |         |        | PC 32:2 | -0.0037 |
|         |        | PC 38:2 | -0.0103   |         |        | PC 38:2 | -0.0018 |
|         |        | PC 40:4 | -0.0047   |         |        | PC 36:6 | -0.0016 |
|         |        | PC 38:7 | -0.0041   |         |        | PC 40:4 | -0.0013 |
|         |        | PC 32:1 | -0.0016   |         |        |         |         |
|         |        | PC 34:4 | -7.00E-04 |         |        |         |         |
|         |        | PC 36:6 | -7.00E-04 |         |        |         |         |
|         |        | PC 32:2 | 6.00E-04  |         |        |         |         |

---

**Supplementary Table III.** Summary of TG species determined by LC-MS/MS in murine hepatocyte LDs from WT and ATGL-KO mice. Samples investigated are from WT-FED, KO-FED, WT-FAS and KO-FAS groups. Absolute amounts (n=3 animals) are calculated in  $\mu\text{mol}$ , and are normalized to gram total acylglycerols (Infinity™ Triglycerides Reagent kit). Corresponding ‰ values are relative to total amount of TG species. Molecular species are derived from possible fatty acyl combinations as determined by fatty acid fragment ions (neutral losses) detected in the corresponding product ion spectra. Fatty acyls in bold are major compositions. n.d., not detected.

| Species |        |               | $\mu\text{mol} / \text{g}$ | ‰                    | Molecular species |  |
|---------|--------|---------------|----------------------------|----------------------|-------------------|--|
| TG 32:0 | WT-FED | 0.904 ± 0.092 | 0.34 ± 0.029               |                      |                   |  |
|         | KO-FED | 0.012 ± 0.001 | 0.002 ± 0.000              |                      |                   |  |
|         | WT-FAS | 0.005 ± 0.004 | 0.002 ± 0.001              |                      |                   |  |
|         | KO-FAS | 0.015 ± 0.002 | 0.004 ± 0.000              |                      |                   |  |
| TG 32:1 | WT-FED | 0.389 ± 0.024 | 0.147 ± 0.005              |                      |                   |  |
|         | KO-FED | 0.003 ± 0.001 | 0.001 ± 0.000              |                      |                   |  |
|         | WT-FAS | 0.005 ± 0.003 | 0.002 ± 0.001              |                      |                   |  |
|         | KO-FAS | n.d.          | n.d.                       |                      |                   |  |
| TG 34:0 | WT-FED | 0.284 ± 0.028 | 0.107 ± 0.008              | <b>8:0_8:0_18:0</b>  | 8:0_10:0_16:0     |  |
|         | KO-FED | n.d.          | n.d.                       |                      |                   |  |
|         | WT-FAS | 0.007 ± 0.001 | 0.002 ± 0.000              |                      |                   |  |
|         | KO-FAS | n.d.          | n.d.                       |                      |                   |  |
| TG 34:1 | WT-FED | 3.359 ± 0.364 | 1.263 ± 0.097              |                      |                   |  |
|         | KO-FED | 0.144 ± 0.052 | 0.026 ± 0.007              |                      |                   |  |
|         | WT-FAS | 0.104 ± 0.014 | 0.035 ± 0.004              |                      |                   |  |
|         | KO-FAS | 0.118 ± 0.053 | 0.035 ± 0.014              |                      |                   |  |
| TG 34:2 | WT-FED | 2.831 ± 0.208 | 1.066 ± 0.059              | <b>8:0_8:0_18:2</b>  |                   |  |
|         | KO-FED | 0.114 ± 0.015 | 0.021 ± 0.004              | <b>8:0_8:0_18:2</b>  |                   |  |
|         | WT-FAS | 0.121 ± 0.015 | 0.041 ± 0.004              | <b>8:0_8:0_18:2</b>  |                   |  |
|         | KO-FAS | 0.106 ± 0.041 | 0.032 ± 0.012              | <b>8:0_8:0_18:2</b>  |                   |  |
| TG 36:0 | WT-FED | 0.045 ± 0.011 | 0.017 ± 0.005              |                      |                   |  |
|         | KO-FED | n.d.          | n.d.                       |                      |                   |  |
|         | WT-FAS | n.d.          | n.d.                       |                      |                   |  |
|         | KO-FAS | 0.002 ± 0.002 | 0.001 ± 0.001              |                      |                   |  |
| TG 36:1 | WT-FED | 0.285 ± 0.03  | 0.107 ± 0.012              | <b>8:0_10:0_18:1</b> | 8:0_8:0_20:1      |  |
|         | KO-FED | 0.011 ± 0.008 | 0.002 ± 0.001              |                      |                   |  |
|         | WT-FAS | 0.014 ± 0.015 | 0.005 ± 0.005              | <b>8:0_10:0_18:1</b> |                   |  |
|         | KO-FAS | 0.003         | 0.001                      | <b>8:0_10:0_18:1</b> |                   |  |
| TG 36:2 | WT-FED | 0.241 ± 0.035 | 0.091 ± 0.011              |                      |                   |  |
|         | KO-FED | 0.018 ± 0.014 | 0.003 ± 0.003              |                      |                   |  |
|         | WT-FAS | 0.019 ± 0.014 | 0.006 ± 0.005              |                      |                   |  |
|         | KO-FAS | 0.005 ± 0.002 | 0.002 ± 0.001              |                      |                   |  |

TG continued

|         |        |        |         |       |         |                      |               |
|---------|--------|--------|---------|-------|---------|----------------------|---------------|
| TG 36:3 | WT-FED | 0.078  | ± 0.028 | 0.029 | ± 0.01  |                      |               |
|         | KO-FED | n.d.   |         | n.d.  |         |                      |               |
|         | WT-FAS | 0.003  |         | 0.001 |         |                      |               |
|         | KO-FAS | n.d.   |         | n.d.  |         |                      |               |
| TG 36:4 | WT-FED | 0.899  | ± 0.034 | 0.339 | ± 0.016 | <b>8:0_8:0_20:4</b>  |               |
|         | KO-FED | 0.036  | ± 0.002 | 0.006 | ± 0.001 |                      |               |
|         | WT-FAS | 0.038  | ± 0.001 | 0.013 | ± 0.001 |                      |               |
|         | KO-FAS | 0.063  | ± 0.041 | 0.018 | ± 0.011 |                      |               |
| TG 38:0 | WT-FED | 0.054  | ± 0.013 | 0.02  | ± 0.005 |                      |               |
|         | KO-FED | 0.004  | ± 0.002 | 0.001 | ± 0.000 |                      |               |
|         | WT-FAS | 0.003  | ± 0.003 | 0.001 | ± 0.001 |                      |               |
|         | KO-FAS | 0.005  |         | 0.001 |         |                      |               |
| TG 38:1 | WT-FED | 0.149  | ± 0.056 | 0.056 | ± 0.019 |                      |               |
|         | KO-FED | n.d.   |         | n.d.  |         |                      |               |
|         | WT-FAS | 0.005  |         | 0.002 |         |                      |               |
|         | KO-FAS | n.d.   |         | n.d.  |         |                      |               |
| TG 38:4 | WT-FED | 0.043  | ± 0.02  | 0.016 | ± 0.008 |                      |               |
|         | KO-FED | n.d.   |         | n.d.  |         |                      |               |
|         | WT-FAS | 0.004  | ± 0.005 | 0.001 | ± 0.002 |                      |               |
|         | KO-FAS | 0.006  | ± 0.005 | 0.002 | ± 0.002 |                      |               |
| TG 40:0 | WT-FED | 0.684  | ± 0.014 | 0.258 | ± 0.014 |                      |               |
|         | KO-FED | n.d.   |         | n.d.  |         |                      |               |
|         | WT-FAS | 0.028  |         | 0.01  |         |                      |               |
|         | KO-FAS | 0.031  | ± 0.005 | 0.009 | ± 0.002 |                      |               |
| TG 40:1 | WT-FED | 1.521  | ± 0.089 | 0.572 | ± 0.016 | <b>8:0_16:0_16:1</b> | 8:0_14:0_18:1 |
|         | KO-FED | 0.058  |         | 0.011 |         |                      |               |
|         | WT-FAS | 0.054  | ± 0.006 | 0.018 | ± 0.002 |                      |               |
|         | KO-FAS | 0.079  |         | 0.022 |         |                      |               |
| TG 40:2 | WT-FED | 0.503  | ± 0.036 | 0.189 | ± 0.007 |                      |               |
|         | KO-FED | 0.006  |         | 0.001 |         |                      |               |
|         | WT-FAS | 0.058  | ± 0.006 | 0.02  | ± 0.003 |                      |               |
|         | KO-FAS | n.d.   |         | n.d.  |         |                      |               |
| TG 42:1 | WT-FED | 9.355  | ± 0.447 | 3.522 | ± 0.073 | <b>8:0_16:0_18:1</b> |               |
|         | KO-FED | 0.451  | ± 0.015 | 0.082 | ± 0.009 |                      |               |
|         | WT-FAS | 0.54   | ± 0.067 | 0.183 | ± 0.016 |                      |               |
|         | KO-FAS | 0.537  | ± 0.031 | 0.165 | ± 0.006 |                      |               |
| TG 42:2 | WT-FED | 17.146 | ± 0.851 | 6.454 | ± 0.141 | <b>8:0_16:0_18:2</b> |               |
|         | KO-FED | 1.213  | ± 0.123 | 0.219 | ± 0.006 | <b>8:0_16:0_18:2</b> |               |
|         | WT-FAS | 1.513  | ± 0.102 | 0.513 | ± 0.016 | <b>8:0_16:0_18:2</b> |               |
|         | KO-FAS | 1.542  | ± 0.136 | 0.472 | ± 0.008 | <b>8:0_16:0_18:2</b> |               |
| TG 42:3 | WT-FED | 2.399  | ± 0.131 | 0.903 | ± 0.034 | <b>8:0_16:1_18:2</b> |               |
|         | KO-FED | 0.132  |         | 0.024 |         |                      |               |
|         | WT-FAS | 0.22   | ± 0.01  | 0.075 | ± 0.002 | <b>8:0_16:1_18:2</b> |               |
|         | KO-FAS | 0.141  | ± 0     | 0.042 | ± 0     |                      |               |

TG continued

|         |        |       |         |       |         |                       |                       |                       |
|---------|--------|-------|---------|-------|---------|-----------------------|-----------------------|-----------------------|
| TG 42:4 | WT-FED | 0.18  | ± 0.04  | 0.068 | ± 0.017 | <b>8:0_16:1_18:3</b>  | 8:0_16:2_18:2         | 8:0_14:0_20:4         |
|         | KO-FED | n.d.  |         | n.d.  |         |                       |                       |                       |
|         | WT-FAS | 0.028 | ± 0.007 | 0.009 | ± 0.002 |                       |                       |                       |
|         | KO-FAS | n.d.  |         | n.d.  |         |                       |                       |                       |
| TG 44:1 | WT-FED | 0.95  | ± 0.054 | 0.358 | ± 0.015 | <b>8:0_18:0_18:1</b>  |                       |                       |
|         | KO-FED | n.d.  |         | n.d.  |         |                       |                       |                       |
|         | WT-FAS | 0.326 |         | 0.107 |         |                       |                       |                       |
|         | KO-FAS | 0.165 | ± 0.026 | 0.053 | ± 0.014 |                       |                       |                       |
| TG 44:2 | WT-FED | 4.266 | ± 0.32  | 1.605 | ± 0.075 | <b>8:0_18:0_18:2</b>  | 8:0_18:1_18:1         | 10:0_16:0_18:2        |
|         | KO-FED | 0.406 | ± 0.063 | 0.073 | ± 0.005 | <b>10:0_16:0_18:2</b> |                       |                       |
|         | WT-FAS | 0.874 | ± 0.117 | 0.296 | ± 0.029 |                       |                       |                       |
|         | KO-FAS | 0.547 | ± 0.042 | 0.168 | ± 0.014 |                       |                       |                       |
| TG 44:3 | WT-FED | 4.797 | ± 0.341 | 1.805 | ± 0.07  | <b>8:0_18:1_18:2</b>  | 8:0_16:0_20:3         |                       |
|         | KO-FED | 0.368 | ± 0.037 | 0.067 | ± 0.013 | <b>8:0_18:1_18:2</b>  | 8:0_16:0_20:3         |                       |
|         | WT-FAS | 0.72  | ± 0.041 | 0.244 | ± 0.007 | <b>8:0_18:1_18:2</b>  | 8:0_16:0_20:3         | 10:0_16:1_18:2        |
|         | KO-FAS | 0.412 | ± 0.133 | 0.124 | ± 0.03  | <b>8:0_18:1_18:2</b>  | 8:0_16:0_20:3         | 10:0_16:1_18:2        |
| TG 44:4 | WT-FED | 7.908 | ± 0.416 | 2.977 | ± 0.066 | <b>8:0_16:0_20:4</b>  |                       |                       |
|         | KO-FED | 0.663 | ± 0.09  | 0.12  | ± 0.004 | <b>8:0_16:0_20:4</b>  | 8:0_18:2_18:2         |                       |
|         | WT-FAS | 0.645 | ± 0.048 | 0.219 | ± 0.009 | <b>8:0_16:0_20:4</b>  |                       |                       |
|         | KO-FAS | 0.617 | ± 0.086 | 0.188 | ± 0.009 | <b>8:0_16:0_20:4</b>  | 8:0_18:2_18:2         |                       |
| TG 44:5 | WT-FED | 0.721 | ± 0.025 | 0.272 | ± 0.003 | <b>8:0_16:1_20:4</b>  | 8:0_18:2_18:3         | 8:0_18:1_18:4         |
|         | KO-FED | 0.033 | ± 0.009 | 0.006 | ± 0.002 |                       |                       |                       |
|         | WT-FAS | 0.06  | ± 0.005 | 0.02  | ± 0.001 | <b>8:0_16:1_20:4</b>  | 8:0_18:2_18:3         | 8:0_18:1_18:4         |
|         | KO-FAS | 0.041 | ± 0.015 | 0.013 | ± 0.006 |                       |                       |                       |
| TG 46:1 | WT-FED | 0.547 | ± 0.157 | 0.206 | ± 0.057 |                       |                       |                       |
|         | KO-FED | 0.648 | ± 0.066 | 0.119 | ± 0.023 |                       |                       |                       |
|         | WT-FAS | 0.966 | ± 0.103 | 0.328 | ± 0.04  |                       |                       |                       |
|         | KO-FAS | 1.212 | ± 0.05  | 0.372 | ± 0.021 |                       |                       |                       |
| TG 46:2 | WT-FED | 0.874 | ± 0.044 | 0.329 | ± 0.016 | <b>10:0_18:0_18:2</b> |                       |                       |
|         | KO-FED | 0.637 | ± 0.068 | 0.115 | ± 0.002 |                       |                       |                       |
|         | WT-FAS | 3.283 | ± 0.22  | 1.114 | ± 0.035 | <b>14:0_16:0_16:2</b> | <b>12:0_16:0_18:2</b> | 10:0_18:0_18:2        |
|         | KO-FAS | 2.936 | ± 0.342 | 0.897 | ± 0.025 |                       |                       |                       |
| TG 46:3 | WT-FED | 1.046 | ± 0.155 | 0.393 | ± 0.05  | <b>8:0_18:0_20:3</b>  |                       |                       |
|         | KO-FED | 0.264 | ± 0.034 | 0.048 | ± 0.01  |                       |                       |                       |
|         | WT-FAS | 2.109 | ± 0.197 | 0.715 | ± 0.043 | <b>12:0_16:1_18:2</b> | <b>12:1_16:0_18:2</b> | <b>10:0_18:1_18:2</b> |
|         | KO-FAS | 0.908 | ± 0.084 | 0.278 | ± 0.01  | <b>12:0_16:1_18:2</b> | <b>12:1_16:0_18:2</b> | <b>10:0_18:1_18:2</b> |
| TG 46:4 | WT-FED | 3.583 | ± 0.206 | 1.349 | ± 0.039 | <b>8:0_18:0_20:4</b>  |                       |                       |
|         | KO-FED | 0.404 | ± 0.065 | 0.074 | ± 0.015 |                       |                       |                       |
|         | WT-FAS | 0.901 | ± 0.074 | 0.306 | ± 0.014 | <b>10:0_18:2_18:2</b> | <b>12:1_16:1_18:2</b> |                       |
|         | KO-FAS | 0.677 | ± 0.066 | 0.207 | ± 0.001 | <b>12:1_16:1_18:2</b> | 10:0_16:0_20:4        | 10:0_18:1_18:3        |
| TG 46:5 | WT-FED | 2.777 | ± 0.082 | 1.046 | ± 0.011 | <b>8:0_16:0_22:5</b>  | <b>8:0_18:1_20:4</b>  |                       |
|         | KO-FED | 0.25  | ± 0.019 | 0.046 | ± 0.006 | <b>8:0_16:0_22:5</b>  | <b>8:0_18:1_20:4</b>  |                       |
|         | WT-FAS | 0.318 | ± 0.024 | 0.108 | ± 0.006 | <b>8:0_18:1_20:4</b>  | <b>10:0_18:2_18:3</b> | 12:1_16:3_18:1        |
|         | KO-FAS | 0.363 | ± 0.019 | 0.111 | ± 0.008 | <b>8:0_18:1_20:4</b>  | 8:0_16:0_22:5         |                       |

## TG continued

|         |        |        |         |       |         |                       |                       |                |
|---------|--------|--------|---------|-------|---------|-----------------------|-----------------------|----------------|
| TG 46:6 | WT-FED | 7.143  | ± 0.365 | 2.689 | ± 0.053 | <b>8:0_16:0_22:6</b>  |                       |                |
|         | KO-FED | 0.601  | ± 0.039 | 0.109 | ± 0.006 | <b>8:0_16:0_22:6</b>  |                       |                |
|         | WT-FAS | 0.532  | ± 0.055 | 0.18  | ± 0.012 | <b>8:0_16:0_22:6</b>  |                       |                |
|         | KO-FAS | 0.57   | ± 0.043 | 0.175 | ± 0.021 | <b>8:0_16:0_22:6</b>  |                       |                |
| TG 48:0 | WT-FED | 0.814  | ± 0.323 | 0.305 | ± 0.116 |                       |                       |                |
|         | KO-FED | 2.774  | ± 0.346 | 0.501 | ± 0.022 |                       |                       |                |
|         | WT-FAS | 2.085  | ± 0.226 | 0.707 | ± 0.051 |                       |                       |                |
|         | KO-FAS | 2.181  | ± 0.443 | 0.668 | ± 0.119 |                       |                       |                |
| TG 48:1 | WT-FED | 5.233  | ± 0.21  | 1.972 | ± 0.088 |                       |                       |                |
|         | KO-FED | 11.003 | ± 0.61  | 1.996 | ± 0.132 |                       |                       |                |
|         | WT-FAS | 5.98   | ± 0.251 | 2.031 | ± 0.061 |                       |                       |                |
|         | KO-FAS | 8.725  | ± 0.734 | 2.674 | ± 0.151 |                       |                       |                |
| TG 48:2 | WT-FED | 6.739  | ± 0.176 | 2.538 | ± 0.056 |                       |                       |                |
|         | KO-FED | 13.138 | ± 1.376 | 2.374 | ± 0.025 | <b>14:0_16:0_18:2</b> | <b>14:0_16:1_18:1</b> |                |
|         | WT-FAS | 11.749 | ± 0.961 | 3.985 | ± 0.206 | <b>14:0_16:0_18:2</b> | <b>14:0_16:1_18:1</b> |                |
|         | KO-FAS | 11.804 | ± 1.185 | 3.611 | ± 0.122 |                       |                       |                |
| TG 48:3 | WT-FED | 2.398  | ± 0.073 | 0.903 | ± 0.008 |                       |                       |                |
|         | KO-FED | 5.116  | ± 0.492 | 0.925 | ± 0.021 |                       |                       |                |
|         | WT-FAS | 9.16   | ± 0.471 | 3.109 | ± 0.061 | <b>14:0_16:1_18:2</b> | <b>14:1_16:1_18:1</b> | 14:0_16:0_18:3 |
|         | KO-FAS | 5.824  | ± 0.592 | 1.781 | ± 0.058 |                       |                       |                |
| TG 48:4 | WT-FED | 0.796  | ± 0.723 | 0.304 | ± 0.284 |                       |                       |                |
|         | KO-FED | 0.902  | ± 0.103 | 0.163 | ± 0.009 |                       |                       |                |
|         | WT-FAS | 4.829  | ± 0.325 | 1.638 | ± 0.06  | <b>12:0_18:2_18:2</b> | <b>12:1_18:1_18:2</b> | 16:1_16:1_16:2 |
|         | KO-FAS | 2.584  | ± 0.318 | 0.79  | ± 0.06  |                       |                       |                |
| TG 48:5 | WT-FED | 0.287  | ± 0.072 | 0.108 | ± 0.023 |                       |                       |                |
|         | KO-FED | 0.141  | ± 0.051 | 0.025 | ± 0.006 |                       |                       |                |
|         | WT-FAS | 1.219  | ± 0.112 | 0.413 | ± 0.024 | <b>12:0_18:2_18:3</b> | <b>12:1_18:2_18:2</b> |                |
|         | KO-FAS | 0.581  | ± 0.042 | 0.178 | ± 0.005 | <b>12:0_18:2_18:3</b> | 12:1_18:2_18:2        |                |
| TG 48:6 | WT-FED | 1.408  | ± 0.105 | 0.53  | ± 0.023 | <b>8:0_18:0_22:6</b>  |                       |                |
|         | KO-FED | 0.096  | ± 0.047 | 0.017 | ± 0.008 | <b>8:0_18:0_22:6</b>  |                       |                |
|         | WT-FAS | 0.533  | ± 0.167 | 0.18  | ± 0.051 |                       |                       |                |
|         | KO-FAS | 0.167  | ± 0.066 | 0.05  | ± 0.018 | <b>8:0_18:0_22:6</b>  |                       |                |
| TG 48:7 | WT-FED | 1.181  | ± 0.064 | 0.444 | ± 0.095 |                       |                       |                |
|         | KO-FED | 0.089  | ± 0.009 | 0.016 | ± 0.000 |                       |                       |                |
|         | WT-FAS | 0.133  | ± 0.013 | 0.045 | ± 0.008 |                       |                       |                |
|         | KO-FAS | 0.117  | ± 0.006 | 0.036 | ± 0.000 |                       |                       |                |
| TG 48:8 | WT-FED | 0.254  | ± 0.034 | 0.01  | ± 0.01  |                       |                       |                |
|         | KO-FED | n.d.   |         | n.d.  |         |                       |                       |                |
|         | WT-FAS | 0.024  | ± 0.005 | 0.003 | ± 0.002 |                       |                       |                |
|         | KO-FAS | n.d.   |         | n.d.  |         |                       |                       |                |
| TG 50:0 | WT-FED | 0.269  | ± 0.012 | 0.101 | ± 0.005 |                       |                       |                |
|         | KO-FED | 1.065  | ± 0.206 | 0.192 | ± 0.024 | <b>16:0_16:0_18:0</b> |                       |                |
|         | WT-FAS | 0.264  | ± 0.092 | 0.09  | ± 0.033 | <b>16:0_16:0_18:0</b> |                       |                |
|         | KO-FAS | 0.592  | ± 0.084 | 0.181 | ± 0.017 |                       |                       |                |



TG continued

|         |        |         |          |         |         |                       |                       |                       |
|---------|--------|---------|----------|---------|---------|-----------------------|-----------------------|-----------------------|
| TG 50:1 | WT-FED | 23.679  | ± 1.936  | 8.907   | ± 0.446 | <b>16:0_16:0_18:1</b> |                       |                       |
|         | KO-FED | 67.21   | ± 4.693  | 12.178  | ± 0.585 | <b>16:0_16:0_18:1</b> |                       |                       |
|         | WT-FAS | 33.376  | ± 3.438  | 11.313  | ± 0.766 | <b>16:0_16:0_18:1</b> |                       |                       |
|         | KO-FAS | 38.801  | ± 4.461  | 11.853  | ± 0.289 | <b>16:0_16:0_18:1</b> |                       |                       |
| TG 50:2 | WT-FED | 59.511  | ± 2.482  | 22.406  | ± 0.429 | <b>16:0_16:1_18:1</b> | <b>16:0_16:0_18:2</b> | 14:0_18:1_18:1        |
|         | KO-FED | 143.334 | ± 10.077 | 25.963  | ± 0.891 | <b>16:0_16:1_18:1</b> | <b>16:0_16:0_18:2</b> | 14:0_18:1_18:1        |
|         | WT-FAS | 80.972  | ± 5.255  | 27.475  | ± 0.967 | <b>16:0_16:1_18:1</b> | <b>16:0_16:0_18:2</b> | 14:0_18:1_18:1        |
|         | KO-FAS | 82.069  | ± 9.006  | 25.08   | ± 0.423 | <b>16:0_16:1_18:1</b> | <b>16:0_16:0_18:2</b> | 14:0_18:1_18:1        |
| TG 50:3 | WT-FED | 47.652  | ± 2.554  | 17.937  | ± 0.476 | <b>16:0_16:1_18:2</b> | <b>16:1_16:1_18:1</b> |                       |
|         | KO-FED | 89.653  | ± 8.796  | 16.215  | ± 0.694 | <b>16:0_16:1_18:2</b> | <b>16:1_16:1_18:1</b> |                       |
|         | WT-FAS | 53.91   | ± 3.016  | 18.294  | ± 0.381 | <b>16:0_16:1_18:2</b> | <b>16:1_16:1_18:1</b> |                       |
|         | KO-FAS | 54.774  | ± 6.007  | 16.739  | ± 0.315 | <b>16:0_16:1_18:2</b> | <b>16:1_16:1_18:1</b> |                       |
| TG 50:4 | WT-FED | 12.808  | ± 0.612  | 4.823   | ± 0.16  | <b>14:0_18:2_18:2</b> | <b>16:1_16:1_18:2</b> |                       |
|         | KO-FED | 27.045  | ± 2.417  | 4.893   | ± 0.095 | <b>14:0_18:2_18:2</b> | <b>16:1_16:1_18:2</b> |                       |
|         | WT-FAS | 25.748  | ± 1.739  | 8.735   | ± 0.284 | <b>14:0_18:2_18:2</b> | <b>16:1_16:1_18:2</b> |                       |
|         | KO-FAS | 15.403  | ± 1.604  | 4.709   | ± 0.062 | <b>14:0_18:2_18:2</b> | <b>16:1_16:1_18:2</b> |                       |
| TG 50:5 | WT-FED | 1.796   | ± 0.009  | 0.677   | ± 0.025 |                       |                       |                       |
|         | KO-FED | 4.517   | ± 0.363  | 0.818   | ± 0.021 | <b>14:0_18:2_18:3</b> | <b>16:0_16:3_18:2</b> |                       |
|         | WT-FAS | 8.881   | ± 0.787  | 3.011   | ± 0.158 | <b>14:0_18:2_18:3</b> | <b>14:1_18:2_18:2</b> |                       |
|         | KO-FAS | 3.139   | ± 0.449  | 0.957   | ± 0.051 |                       |                       |                       |
| TG 50:6 | WT-FED | 0.655   | ± 0.162  | 0.248   | ± 0.068 |                       |                       |                       |
|         | KO-FED | 0.529   | ± 0.024  | 0.096   | ± 0.006 |                       |                       |                       |
|         | WT-FAS | 2.542   | ± 0.31   | 0.861   | ± 0.075 | <b>14:1_18:2_18:3</b> | <b>14:2_18:2_18:2</b> |                       |
|         | KO-FAS | 1.077   | ± 0.182  | 0.328   | ± 0.026 | <b>14:2_18:2_18:2</b> |                       |                       |
| TG 50:7 | WT-FED | 0.154   | ± 0.094  | 0.059   | ± 0.037 |                       |                       |                       |
|         | KO-FED | 0.042   | ± 0.023  | 0.008   | ± 0.005 |                       |                       |                       |
|         | WT-FAS | 0.537   | ± 0.023  | 0.182   | ± 0.004 |                       |                       |                       |
|         | KO-FAS | 0.213   | ± 0.049  | 0.065   | ± 0.01  |                       |                       |                       |
| TG 52:1 | WT-FED | 5.659   | ± 1.099  | 2.124   | ± 0.344 | <b>16:0_18:0_18:1</b> | <b>16:0_16:0_20:1</b> |                       |
|         | KO-FED | 21.286  | ± 2.044  | 3.85    | ± 0.141 | <b>16:0_18:0_18:1</b> |                       |                       |
|         | WT-FAS | 8.166   | ± 1.944  | 2.788   | ± 0.761 | <b>16:0_18:0_18:1</b> |                       |                       |
|         | KO-FAS | 12.093  | ± 1.894  | 3.684   | ± 0.24  | <b>16:0_18:0_18:1</b> |                       |                       |
| TG 52:2 | WT-FED | 269.04  | ± 1.855  | 101.39  | ± 3.962 | <b>16:0_18:1_18:1</b> |                       |                       |
|         | KO-FED | 922.803 | ± 93.904 | 166.791 | ± 1.483 | <b>16:0_18:1_18:1</b> |                       |                       |
|         | WT-FAS | 206.375 | ± 14.894 | 70.002  | ± 2.522 | <b>16:0_18:1_18:1</b> |                       |                       |
|         | KO-FAS | 426.843 | ± 50.009 | 130.392 | ± 3.444 | <b>16:0_18:1_18:1</b> |                       |                       |
| TG 52:3 | WT-FED | 620.933 | ± 24.304 | 233.783 | ± 2.279 | <b>16:0_18:1_18:2</b> | <b>16:1_18:1_18:1</b> |                       |
|         | KO-FED | 1333.99 | ± 169.52 | 240.73  | ± 6.582 | <b>16:0_18:1_18:2</b> | <b>16:1_18:1_18:1</b> |                       |
|         | WT-FAS | 465.764 | ± 12.407 | 158.188 | ± 3.669 | <b>16:0_18:1_18:2</b> | <b>16:1_18:1_18:1</b> |                       |
|         | KO-FAS | 646.958 | ± 58.701 | 197.962 | ± 1.658 | <b>16:0_18:1_18:2</b> | <b>16:1_18:1_18:1</b> |                       |
| TG 52:4 | WT-FED | 331.949 | ± 15.981 | 124.961 | ± 2.727 | <b>16:0_18:2_18:2</b> | <b>16:0_18:1_18:3</b> | <b>16:1_18:1_18:2</b> |
|         | KO-FED | 832.913 | ± 84.656 | 150.548 | ± 1.337 | <b>16:0_18:2_18:2</b> | <b>16:0_18:1_18:3</b> | <b>16:1_18:1_18:2</b> |
|         | WT-FAS | 358.767 | ± 14.36  | 121.8   | ± 1.844 | <b>16:0_18:2_18:2</b> | <b>16:0_18:1_18:3</b> | <b>16:1_18:1_18:2</b> |
|         | KO-FAS | 319.912 | ± 35.394 | 97.759  | ± 1.798 | <b>16:0_18:2_18:2</b> | <b>16:0_18:1_18:3</b> | <b>16:1_18:1_18:2</b> |

## TG continued

|         |        |                  |                |                       |                       |                       |
|---------|--------|------------------|----------------|-----------------------|-----------------------|-----------------------|
| TG 52:5 | WT-FED | 55.084 ± 1.773   | 20.745 ± 0.399 | <b>16:1_18:2_18:2</b> | <b>16:0_18:2_18:3</b> | 16:0_18:1_18:4        |
|         | KO-FED | 190.52 ± 14.988  | 34.489 ± 0.892 | <b>16:1_18:2_18:2</b> | <b>16:0_18:2_18:3</b> | 16:0_18:1_18:4        |
|         | WT-FAS | 89.252 ± 4.727   | 30.29 ± 0.588  | <b>16:1_18:2_18:2</b> | <b>16:0_18:2_18:3</b> | 16:0_18:1_18:4        |
|         | KO-FAS | 57.577 ± 7.542   | 17.571 ± 0.678 | <b>16:1_18:2_18:2</b> | <b>16:0_18:2_18:3</b> | <b>16:0_16:1_20:4</b> |
| TG 52:6 | WT-FED | 8.001 ± 0.23     | 3.013 ± 0.059  | <b>16:1_18:2_18:3</b> | <b>16:0_18:2_18:4</b> |                       |
|         | KO-FED | 21.427 ± 2.254   | 3.872 ± 0.07   | <b>16:1_18:2_18:3</b> | <b>16:0_18:2_18:4</b> |                       |
|         | WT-FAS | 20.251 ± 0.941   | 6.874 ± 0.12   | <b>16:1_18:2_18:3</b> | <b>16:0_18:2_18:4</b> |                       |
|         | KO-FAS | 10.073 ± 1.091   | 3.079 ± 0.06   | <b>16:1_18:2_18:3</b> | <b>16:0_18:2_18:4</b> |                       |
| TG 52:7 | WT-FED | 0.858 ± 0.1      | 0.323 ± 0.033  | <b>16:1_18:2_18:4</b> |                       |                       |
|         | KO-FED | 1.783 ± 0.149    | 0.323 ± 0.028  | <b>16:1_18:2_18:4</b> |                       |                       |
|         | WT-FAS | 4.393 ± 0.297    | 1.49 ± 0.051   | <b>16:2_18:2_18:3</b> |                       |                       |
|         | KO-FAS | 1.157 ± 0.294    | 0.351 ± 0.063  | <b>16:1_18:2_18:4</b> |                       |                       |
| TG 52:8 | WT-FED | n.d.             | n.d.           |                       |                       |                       |
|         | KO-FED | 0.184 ± 0.03     | 0.033 ± 0.002  | <b>14:2_16:0_22:6</b> |                       |                       |
|         | WT-FAS | 0.878 ± 0.096    | 0.298 ± 0.023  | <b>14:2_16:0_22:6</b> |                       |                       |
|         | KO-FAS | 0.408 ± 0.024    | 0.125 ± 0.005  | <b>14:2_16:0_22:6</b> |                       |                       |
| TG 54:1 | WT-FED | 2.253 ± 0.144    | 0.848 ± 0.027  | <b>16:0_18:1_20:0</b> | 16:0_18:0_20:1        |                       |
|         | KO-FED | 3.246 ± 0.254    | 0.588 ± 0.016  | <b>16:0_18:1_20:0</b> | 16:0_18:0_20:1        |                       |
|         | WT-FAS | 0.795 ± 0.059    | 0.27 ± 0.013   | <b>16:0_18:1_20:0</b> | 16:0_18:0_20:1        |                       |
|         | KO-FAS | 1.922 ± 0.235    | 0.587 ± 0.018  | <b>16:0_18:1_20:0</b> | 16:0_18:0_20:1        |                       |
| TG 54:2 | WT-FED | 18.347 ± 2.827   | 6.895 ± 0.909  | <b>18:0_18:1_18:1</b> | <b>16:0_18:1_20:1</b> | 16:0_20:0_18:2        |
|         | KO-FED | 75.775 ± 15.213  | 13.64 ± 2.000  | <b>18:0_18:1_18:1</b> | <b>16:0_18:1_20:1</b> | 16:0_20:0_18:2        |
|         | WT-FAS | 28.857 ± 2.081   | 9.788 ± 0.353  | <b>18:0_18:1_18:1</b> | 16:0_18:1_20:1        | 16:0_20:0_18:2        |
|         | KO-FAS | 17.709 ± 3.499   | 5.381 ± 0.581  | <b>18:0_18:1_18:1</b> | <b>16:0_18:1_20:1</b> | 16:0_20:0_18:2        |
| TG 54:3 | WT-FED | 120.628 ± 8.502  | 45.5 ± 4.375   | <b>18:1_18:1_18:1</b> | 16:0_18:2_20:1        | 16:0_18:1_20:2        |
|         | KO-FED | 273.522 ± 32.588 | 49.379 ± 0.855 | <b>18:1_18:1_18:1</b> | 16:0_18:2_20:1        | 16:0_18:1_20:2        |
|         | WT-FAS | 155.432 ± 8.825  | 52.745 ± 1.223 | <b>18:1_18:1_18:1</b> | 16:0_18:2_20:1        | 16:0_18:1_20:2        |
|         | KO-FAS | 161.553 ± 13.912 | 49.448 ± 0.536 | <b>18:1_18:1_18:1</b> | 16:0_18:2_20:1        | 16:0_18:1_20:2        |
| TG 54:4 | WT-FED | 216.878 ± 8.333  | 81.657 ± 0.877 | <b>18:1_18:1_18:2</b> | 16:0_18:1_20:3        |                       |
|         | KO-FED | 384.72 ± 51.149  | 69.388 ± 2.141 | <b>18:1_18:1_18:2</b> | 16:0_18:1_20:3        |                       |
|         | WT-FAS | 290.265 ± 12.86  | 98.623 ± 5.339 | <b>18:1_18:1_18:2</b> | 16:0_18:1_20:3        |                       |
|         | KO-FAS | 229.996 ± 18.821 | 70.417 ± 1.104 | <b>18:1_18:1_18:2</b> | 16:0_18:1_20:3        |                       |
| TG 54:5 | WT-FED | 210.17 ± 11.859  | 79.1 ± 1.963   | <b>16:0_18:1_20:4</b> | <b>18:1_18:2_18:2</b> | 18:1_18:1_18:3        |
|         | KO-FED | 373.723 ± 30.244 | 67.644 ± 1.618 | <b>16:0_18:1_20:4</b> | <b>18:1_18:2_18:2</b> | 18:1_18:1_18:3        |
|         | WT-FAS | 341.695 ± 6.892  | 116.06 ± 2.542 | <b>16:0_18:1_20:4</b> | <b>18:1_18:2_18:2</b> | 18:1_18:1_18:3        |
|         | KO-FAS | 248.659 ± 11.662 | 76.306 ± 3.835 | <b>16:0_18:1_20:4</b> | <b>18:1_18:2_18:2</b> | 18:1_18:1_18:3        |
| TG 54:6 | WT-FED | 106.672 ± 2.985  | 40.172 ± 0.345 | <b>18:1_18:2_18:3</b> | <b>16:0_18:2_20:4</b> | 16:0_16:0_22:6        |
|         | KO-FED | 227.87 ± 14.516  | 41.298 ± 1.866 | <b>18:1_18:2_18:3</b> | <b>16:0_18:2_20:4</b> | 16:0_16:0_22:6        |
|         | WT-FAS | 229.161 ± 9.874  | 77.788 ± 0.757 | <b>18:1_18:2_18:3</b> | <b>16:0_18:2_20:4</b> | 16:0_16:0_22:6        |
|         | KO-FAS | 181.182 ± 17.221 | 55.424 ± 0.424 | <b>18:1_18:2_18:3</b> | <b>16:0_18:2_20:4</b> | 16:0_16:0_22:6        |
| TG 54:7 | WT-FED | 21.294 ± 0.869   | 8.017 ± 0.094  | <b>18:2_18:2_18:3</b> | <b>16:0_16:1_22:6</b> | <b>16:0_18:3_20:4</b> |
|         | KO-FED | 53.827 ± 4.228   | 9.747 ± 0.425  | <b>18:2_18:2_18:3</b> | <b>16:0_16:1_22:6</b> | <b>16:0_18:3_20:4</b> |
|         | WT-FAS | 59.528 ± 3.45    | 20.2 ± 0.496   | <b>18:2_18:2_18:3</b> | <b>16:0_16:1_22:6</b> | <b>16:0_18:3_20:4</b> |
|         | KO-FAS | 32.426 ± 3.625   | 9.909 ± 0.23   | <b>18:2_18:2_18:3</b> | <b>16:0_16:1_22:6</b> | <b>16:0_18:3_20:4</b> |

## TG continued

|          |        |         |          |        |         |                       |                       |                       |
|----------|--------|---------|----------|--------|---------|-----------------------|-----------------------|-----------------------|
| TG 54:8  | WT-FED | 2.529   | ± 0.062  | 0.953  | ± 0.03  | <b>18:2_18:3_18:3</b> | <b>18:2_18:2_18:4</b> |                       |
|          | KO-FED | 5.001   | ± 0.405  | 0.905  | ± 0.026 | <b>18:2_18:3_18:3</b> |                       |                       |
|          | WT-FAS | 10.201  | ± 1.019  | 3.458  | ± 0.229 | <b>18:2_18:3_18:3</b> | <b>18:2_18:2_18:4</b> |                       |
|          | KO-FAS | 3.838   | ± 0.324  | 1.175  | ± 0.036 | <b>18:2_18:3_18:3</b> |                       |                       |
| TG 54:9  | WT-FED | 0.179   | ± 0.021  | 0.067  | ± 0.006 |                       |                       |                       |
|          | KO-FED | 0.349   | ± 0.031  | 0.063  | ± 0.002 | <b>18:3_18:3_18:3</b> | <b>18:2_18:3_18:4</b> |                       |
|          | WT-FAS | 1.274   | ± 0.127  | 0.432  | ± 0.029 | <b>18:3_18:3_18:3</b> | <b>18:2_18:3_18:4</b> |                       |
|          | KO-FAS | 0.352   | ± 0.012  | 0.109  | ± 0.015 |                       |                       |                       |
| TG 54:10 | WT-FED | n.d.    |          | n.d.   |         |                       |                       |                       |
|          | KO-FED | 0.016   | ± 0.003  | 0.003  | ± 0.000 |                       |                       |                       |
|          | WT-FAS | 0.138   | ± 0.038  | 0.047  | ± 0.011 |                       |                       |                       |
|          | KO-FAS | 0.04    | ± 0.008  | 0.012  | ± 0.004 |                       |                       |                       |
| TG 56:2  | WT-FED | 3.247   | ± 0.2    | 1.222  | ± 0.049 | <b>18:1_16:0_22:1</b> | <b>18:1_18:1_20:0</b> |                       |
|          | KO-FED | 3.019   | ± 0.58   | 0.538  | ± 0.027 | <b>18:1_16:0_22:1</b> | <b>18:1_18:1_20:0</b> |                       |
|          | WT-FAS | n.d.    |          | n.d.   |         |                       |                       |                       |
|          | KO-FAS | 1.114   | ± 0.381  | 0.346  | ± 0.133 | <b>18:1_16:0_22:1</b> | <b>18:1_18:1_20:0</b> |                       |
| TG 56:3  | WT-FED | 12.859  | ± 1.368  | 4.853  | ± 0.645 | <b>18:1_18:1_20:1</b> | <b>18:1_18:2_20:0</b> | <b>16:0_18:2_22:1</b> |
|          | KO-FED | 21.888  | ± 1.443  | 3.976  | ± 0.37  | <b>18:1_18:1_20:1</b> | <b>18:1_18:2_20:0</b> | 16:0_18:2_22:1        |
|          | WT-FAS | 11.846  | ± 1.125  | 4.016  | ± 0.241 | <b>18:1_18:1_20:1</b> | <b>18:1_18:2_20:0</b> | 16:0_18:2_22:1        |
|          | KO-FAS | 8.388   | ± 1.444  | 2.557  | ± 0.25  | <b>18:1_18:1_20:1</b> | <b>18:1_18:2_20:0</b> | <b>16:0_18:2_22:1</b> |
| TG 56:4  | WT-FED | 18.418  | ± 2.749  | 6.921  | ± 0.866 | <b>18:1_18:2_20:1</b> | 16:0_20:2_20:2        |                       |
|          | KO-FED | 27.72   | ± 3.56   | 5.002  | ± 0.188 | <b>18:1_18:2_20:1</b> | 16:0_20:2_20:2        |                       |
|          | WT-FAS | 20.969  | ± 2.277  | 7.107  | ± 0.546 | <b>18:1_18:2_20:1</b> | 16:0_20:2_20:2        |                       |
|          | KO-FAS | 13.66   | ± 2.948  | 4.146  | ± 0.528 | <b>18:1_18:2_20:1</b> | 16:0_20:2_20:2        |                       |
| TG 56:5  | WT-FED | 33.437  | ± 0.991  | 12.601 | ± 0.619 | <b>18:1_16:0_22:4</b> | <b>18:0_18:1_20:4</b> | <b>18:0_18:2_20:3</b> |
|          | KO-FED | 40.246  | ± 5.843  | 7.258  | ± 0.407 | <b>18:1_16:0_22:4</b> | <b>18:0_18:1_20:4</b> | <b>18:0_18:2_20:3</b> |
|          | WT-FAS | 21.008  | ± 2.655  | 7.117  | ± 0.658 | <b>18:1_16:0_22:4</b> | <b>18:0_18:1_20:4</b> | <b>18:0_18:2_20:3</b> |
|          | KO-FAS | 35.289  | ± 1.932  | 10.828 | ± 0.588 | <b>18:1_16:0_22:4</b> | <b>18:0_18:1_20:4</b> | <b>18:0_18:2_20:3</b> |
| TG 56:6  | WT-FED | 61.433  | ± 2.146  | 23.134 | ± 0.394 | <b>18:1_18:1_20:4</b> | <b>16:0_18:1_22:5</b> | <b>18:1_18:2_20:3</b> |
|          | KO-FED | 61.071  | ± 7.722  | 11.022 | ± 0.34  | <b>18:1_18:1_20:4</b> | <b>16:0_18:1_22:5</b> | <b>18:1_18:2_20:3</b> |
|          | WT-FAS | 42.001  | ± 0.657  | 14.278 | ± 0.777 | <b>18:1_18:1_20:4</b> | <b>16:0_18:1_22:5</b> | 18:1_18:2_20:3        |
|          | KO-FAS | 78.956  | ± 4.73   | 24.209 | ± 0.904 | <b>18:1_18:1_20:4</b> | <b>16:0_18:1_22:5</b> | <b>18:1_18:2_20:3</b> |
| TG 56:7  | WT-FED | 97.965  | ± 3.898  | 36.884 | ± 0.453 | <b>16:0_18:1_22:6</b> | <b>16:1_18:1_22:5</b> | <b>18:0_18:3_20:4</b> |
|          | KO-FED | 88.472  | ± 4.941  | 16.068 | ± 1.403 | <b>16:0_18:1_22:6</b> | 16:1_18:1_22:5        | 18:0_18:3_20:4        |
|          | WT-FAS | 92.051  | ± 2.484  | 31.267 | ± 0.968 | <b>16:0_18:1_22:6</b> | <b>16:1_18:1_22:5</b> | <b>18:1_18:2_20:4</b> |
|          | KO-FAS | 155.447 | ± 15.646 | 47.533 | ± 0.418 | <b>16:0_18:1_22:6</b> | <b>18:1_18:2_20:4</b> |                       |
| TG 56:8  | WT-FED | 68.464  | ± 1.114  | 25.79  | ± 0.469 | <b>16:0_18:2_22:6</b> | 16:1_18:2_22:5        | 18:1_18:3_20:4        |
|          | KO-FED | 83.385  | ± 7.265  | 15.086 | ± 0.288 | <b>16:0_18:2_22:6</b> | <b>16:1_18:2_22:5</b> | <b>18:1_18:3_20:4</b> |
|          | WT-FAS | 97.969  | ± 4.727  | 33.251 | ± 0.469 | <b>16:0_18:2_22:6</b> | <b>16:1_18:2_22:5</b> | <b>18:1_18:3_20:4</b> |
|          | KO-FAS | 138.971 | ± 12.707 | 42.521 | ± 0.481 | <b>16:0_18:2_22:6</b> | 16:1_18:2_22:5        | 18:1_18:3_20:4        |
| TG 56:9  | WT-FED | 6.539   | ± 0.093  | 2.464  | ± 0.069 | <b>16:1_18:2_22:6</b> | <b>18:2_18:2_20:5</b> | <b>18:2_18:3_20:4</b> |
|          | KO-FED | 11.586  | ± 0.874  | 2.099  | ± 0.106 | <b>16:1_18:2_22:6</b> | <b>18:2_18:2_20:5</b> | <b>18:2_18:3_20:4</b> |
|          | WT-FAS | 19.678  | ± 1.701  | 6.673  | ± 0.351 | <b>16:1_18:2_22:6</b> | <b>18:2_18:2_20:5</b> | <b>18:2_18:3_20:4</b> |
|          | KO-FAS | 13.707  | ± 1.556  | 4.188  | ± 0.104 | <b>18:2_18:3_20:4</b> | 16:1_18:2_22:6        | 18:2_18:2_20:5        |

## TG continued

|          |        |        |         |        |         |                       |                       |                       |
|----------|--------|--------|---------|--------|---------|-----------------------|-----------------------|-----------------------|
| TG 56:10 | WT-FED | 0.455  | ± 0.11  | 0.171  | ± 0.041 |                       |                       |                       |
|          | KO-FED | 0.665  | ± 0.134 | 0.12   | ± 0.017 | <b>16:1_18:3_22:6</b> | <b>18:2_18:3_20:5</b> | <b>18:3_18:3_20:4</b> |
|          | WT-FAS | 2.053  | ± 0.204 | 0.696  | ± 0.045 | <b>16:2_18:2_22:6</b> | <b>18:2_18:3_20:5</b> | <b>18:2_18:4_20:4</b> |
|          | KO-FAS | 0.825  | ± 0.136 | 0.251  | ± 0.02  | <b>16:1_18:3_22:6</b> | 18:2_18:3_20:5        | 16:2_20:4_20:4        |
| TG 56:11 | WT-FED | n.d.   |         | n.d.   |         |                       |                       |                       |
|          | KO-FED | n.d.   |         | n.d.   |         |                       |                       |                       |
|          | WT-FAS | 0.203  | ± 0.006 | 0.069  | ± 0.001 |                       |                       |                       |
|          | KO-FAS | 0.053  | ± 0.001 | 0.016  | ± 0.001 |                       |                       |                       |
| TG 58:2  | WT-FED | 0.392  | ± 0.197 | 0.148  | ± 0.076 |                       |                       |                       |
|          | KO-FED | 0.668  | ± 0.181 | 0.123  | ± 0.04  |                       |                       |                       |
|          | WT-FAS | 0.194  | ± 0.036 | 0.066  | ± 0.011 |                       |                       |                       |
|          | KO-FAS | 0.31   | ± 0.138 | 0.094  | ± 0.038 |                       |                       |                       |
| TG 58:3  | WT-FED | 1.359  | ± 0.292 | 0.511  | ± 0.107 | <b>16:0_18:2_24:1</b> | 18:1_18:1_22:1        | 18:2_20:0_20:1        |
|          | KO-FED | 1.726  | ± 0.228 | 0.314  | ± 0.05  | <b>16:0_18:2_24:1</b> | <b>18:1_18:1_22:1</b> | <b>18:2_20:0_20:1</b> |
|          | WT-FAS | 0.956  | ± 0.42  | 0.323  | ± 0.138 | <b>16:0_18:2_24:1</b> | <b>18:1_18:1_22:1</b> | <b>18:2_20:0_20:1</b> |
|          | KO-FAS | 0.877  | ± 0.153 | 0.27   | ± 0.048 | <b>16:0_18:2_24:1</b> | 18:1_18:1_22:1        | 18:2_20:0_20:1        |
| TG 58:4  | WT-FED | 2.647  | ± 0.207 | 0.996  | ± 0.063 |                       |                       |                       |
|          | KO-FED | 3.033  | ± 0.42  | 0.547  | ± 0.031 |                       |                       |                       |
|          | WT-FAS | 1.573  | ± 0.22  | 0.533  | ± 0.059 |                       |                       |                       |
|          | KO-FAS | 1.467  | ± 0.306 | 0.454  | ± 0.115 |                       |                       |                       |
| TG 58:5  | WT-FED | 5.708  | ± 2.524 | 2.143  | ± 0.922 |                       |                       |                       |
|          | KO-FED | 2.096  | ± 0.821 | 0.388  | ± 0.168 |                       |                       |                       |
|          | WT-FAS | 1.155  | ± 0.029 | 0.392  | ± 0.006 |                       |                       |                       |
|          | KO-FAS | 4.593  | ± 0.435 | 1.421  | ± 0.271 |                       |                       |                       |
| TG 58:6  | WT-FED | 8.26   | ± 0.44  | 3.115  | ± 0.242 | <b>16:0_18:1_24:5</b> | 18:1_18:1_22:4        |                       |
|          | KO-FED | 5.592  | ± 0.397 | 1.013  | ± 0.037 |                       |                       |                       |
|          | WT-FAS | 4.144  | ± 0.233 | 1.408  | ± 0.089 | <b>16:0_18:1_24:5</b> | <b>18:1_18:1_22:4</b> |                       |
|          | KO-FAS | 17.548 | ± 0.372 | 5.395  | ± 0.441 | <b>16:0_18:1_24:5</b> | 18:1_18:1_22:4        |                       |
| TG 58:7  | WT-FED | 24.888 | ± 0.829 | 9.373  | ± 0.178 | <b>18:1_18:2_22:4</b> | 16:0_18:1_24:6        |                       |
|          | KO-FED | 14.829 | ± 1.472 | 2.681  | ± 0.044 | <b>18:1_18:2_22:4</b> | <b>16:0_18:1_24:6</b> | <b>18:1_18:1_22:5</b> |
|          | WT-FAS | 11.536 | ± 1.127 | 3.913  | ± 0.293 |                       |                       |                       |
|          | KO-FAS | 35.667 | ± 4.65  | 10.916 | ± 1.059 | <b>18:1_18:2_22:4</b> | 16:0_18:1_24:6        |                       |
| TG 58:8  | WT-FED | 31.095 | ± 1.255 | 11.707 | ± 0.161 | 18:1_18:2_22:5        |                       |                       |
|          | KO-FED | 24.952 | ± 2.747 | 4.51   | ± 0.174 | <b>18:1_18:2_22:5</b> |                       |                       |
|          | WT-FAS | 22.826 | ± 0.805 | 7.758  | ± 0.44  | <b>18:1_18:2_22:5</b> |                       |                       |
|          | KO-FAS | 51.239 | ± 5.072 | 15.679 | ± 0.669 | 18:1_18:2_22:5        |                       |                       |
| TG 58:9  | WT-FED | 19.72  | ± 0.448 | 7.427  | ± 0.092 | <b>18:1_18:2_22:6</b> |                       |                       |
|          | KO-FED | 20.697 | ± 1.306 | 3.751  | ± 0.159 | <b>18:1_18:2_22:6</b> |                       |                       |
|          | WT-FAS | 27.892 | ± 1.077 | 9.469  | ± 0.118 | <b>18:1_18:2_22:6</b> |                       |                       |
|          | KO-FAS | 38.286 | ± 3.492 | 11.715 | ± 0.085 | <b>18:1_18:2_22:6</b> |                       |                       |
| TG 58:10 | WT-FED | 7.175  | ± 0.299 | 2.702  | ± 0.078 | <b>18:2_20:4_20:4</b> | 18:2_18:2_22:6        |                       |
|          | KO-FED | 10.483 | ± 0.761 | 1.899  | ± 0.074 | <b>18:2_20:4_20:4</b> | <b>18:2_18:2_22:6</b> |                       |
|          | WT-FAS | 23.972 | ± 0.898 | 8.138  | ± 0.065 | <b>18:2_18:2_22:6</b> |                       |                       |
|          | KO-FAS | 26.779 | ± 2.522 | 8.193  | ± 0.128 | <b>18:2_18:2_22:6</b> | 18:2_20:4_20:4        |                       |

## TG continued

---

|          |        |       |         |       |         |                       |                       |
|----------|--------|-------|---------|-------|---------|-----------------------|-----------------------|
| TG 58:11 | WT-FED | 0.94  | ± 0.057 | 0.354 | ± 0.024 |                       |                       |
|          | KO-FED | 1.641 | ± 0.156 | 0.297 | ± 0.023 | <b>18:2_18:3_22:6</b> | <b>18:3_20:4_20:4</b> |
|          | WT-FAS | 3.379 | ± 0.374 | 1.145 | ± 0.087 | <b>18:2_18:3_22:6</b> | <b>18:3_20:4_20:4</b> |
|          | KO-FAS | 3.097 | ± 0.421 | 0.945 | ± 0.043 | <b>18:2_18:3_22:6</b> | <b>18:3_20:4_20:4</b> |
| TG 58:12 | WT-FED | 0.037 | ± 0.013 | 0.014 | ± 0.004 |                       |                       |
|          | KO-FED | 0.098 | ± 0.012 | 0.018 | ± 0.003 |                       |                       |
|          | WT-FAS | 0.281 | ± 0.047 | 0.095 | ± 0.015 |                       |                       |
|          | KO-FAS | 0.193 | ± 0.039 | 0.059 | ± 0.007 |                       |                       |
| TG 60:5  | WT-FED | 0.283 | ± 0.072 | 0.107 | ± 0.029 |                       |                       |
|          | KO-FED | 0.575 | ± 0.037 | 0.104 | ± 0.011 |                       |                       |
|          | WT-FAS | 0.261 | ± 0.051 | 0.088 | ± 0.015 |                       |                       |
|          | KO-FAS | 0.284 | ± 0.067 | 0.087 | ± 0.02  |                       |                       |
| TG 60:6  | WT-FED | 0.587 | ± 0.137 | 0.22  | ± 0.044 |                       |                       |
|          | KO-FED | 0.279 | ± 0.137 | 0.049 | ± 0.019 |                       |                       |
|          | WT-FAS | 0.145 | ± 0.035 | 0.049 | ± 0.013 |                       |                       |
|          | KO-FAS | 1.159 | ± 0.099 | 0.355 | ± 0.013 |                       |                       |
| TG 60:7  | WT-FED | 1.698 | ± 0.929 | 0.635 | ± 0.33  |                       |                       |
|          | KO-FED | 0.683 | ± 0.349 | 0.125 | ± 0.071 |                       |                       |
|          | WT-FAS | 0.249 | ± 0.051 | 0.085 | ± 0.021 |                       |                       |
|          | KO-FAS | 3.698 | ± 0.659 | 1.126 | ± 0.124 |                       |                       |
| TG 60:8  | WT-FED | 3.621 | ± 1.38  | 1.357 | ± 0.484 |                       |                       |
|          | KO-FED | 1.492 | ± 0.556 | 0.265 | ± 0.073 |                       |                       |
|          | WT-FAS | 0.814 | ± 0.411 | 0.278 | ± 0.141 |                       |                       |
|          | KO-FAS | 7.698 | ± 1.465 | 2.345 | ± 0.304 |                       |                       |
| TG 60:9  | WT-FED | 5.026 | ± 0.123 | 1.894 | ± 0.062 |                       |                       |
|          | KO-FED | 3.92  | ± 0.599 | 0.709 | ± 0.094 |                       |                       |
|          | WT-FAS | 2.041 | ± 0.76  | 0.688 | ± 0.243 |                       |                       |
|          | KO-FAS | 8.741 | ± 1.421 | 2.663 | ± 0.193 |                       |                       |
| TG 60:10 | WT-FED | 2.811 | ± 0.351 | 1.061 | ± 0.15  |                       |                       |
|          | KO-FED | 2.208 | ± 0.151 | 0.402 | ± 0.055 |                       |                       |
|          | WT-FAS | 1.665 | ± 0.128 | 0.567 | ± 0.062 |                       |                       |
|          | KO-FAS | 7.754 | ± 0.684 | 2.373 | ± 0.062 |                       |                       |
| TG 60:11 | WT-FED | 1.827 | ± 0.16  | 0.688 | ± 0.064 |                       |                       |
|          | KO-FED | 1.673 | ± 0.31  | 0.301 | ± 0.033 |                       |                       |
|          | WT-FAS | 2.732 | ± 0.216 | 0.927 | ± 0.046 |                       |                       |
|          | KO-FAS | 5.974 | ± 0.638 | 1.826 | ± 0.035 |                       |                       |
| TG 60:12 | WT-FED | 1.184 | ± 0.114 | 0.445 | ± 0.032 |                       |                       |
|          | KO-FED | 1.372 | ± 0.11  | 0.248 | ± 0.007 |                       |                       |
|          | WT-FAS | 3.211 | ± 0.324 | 1.088 | ± 0.071 | <b>18:2_20:4_22:6</b> |                       |
|          | KO-FAS | 8.176 | ± 0.851 | 2.499 | ± 0.03  | <b>18:2_20:4_22:6</b> |                       |
| TG 60:13 | WT-FED | 0.065 |         | 0.025 |         |                       |                       |
|          | KO-FED | 0.192 | ± 0.017 | 0.034 | ± 0.002 |                       |                       |
|          | WT-FAS | 0.289 | ± 0.021 | 0.098 | ± 0.004 |                       |                       |
|          | KO-FAS | 0.407 | ± 0.06  | 0.124 | ± 0.007 | <b>20:4_20:4_20:5</b> | <b>18:3_20:4_22:6</b> |

---

TG continued

---

|          |        |       |         |       |         |                       |
|----------|--------|-------|---------|-------|---------|-----------------------|
| TG 62:11 | WT-FED | 0.45  | ± 0.166 | 0.168 | ± 0.056 |                       |
|          | KO-FED | 0.104 | ± 0.049 | 0.018 | ± 0.007 |                       |
|          | WT-FAS | 0.192 | ± 0.049 | 0.065 | ± 0.017 |                       |
|          | KO-FAS | 2.208 | ± 0.494 | 0.676 | ± 0.134 |                       |
| TG 62:12 | WT-FED | 0.609 | ± 0.019 | 0.229 | ± 0.012 |                       |
|          | KO-FED | 0.408 | ± 0.156 | 0.072 | ± 0.023 | <b>18:0_22:6_22:6</b> |
|          | WT-FAS | 0.671 | ± 0.096 | 0.228 | ± 0.038 |                       |
|          | KO-FAS | 2.904 | ± 0.358 | 0.887 | ± 0.039 | <b>18:0_22:6_22:6</b> |
| TG 62:13 | WT-FED | 0.263 | ± 0.073 | 0.099 | ± 0.027 |                       |
|          | KO-FED | 0.377 | ± 0.028 | 0.068 | ± 0.002 |                       |
|          | WT-FAS | 0.612 | ± 0.035 | 0.208 | ± 0.007 |                       |
|          | KO-FAS | 1.027 | ± 0.03  | 0.316 | ± 0.022 |                       |
| TG 62:14 | WT-FED | 0.121 | ± 0.002 | 0.045 | ± 0.001 |                       |
|          | KO-FED | 0.252 | ± 0.022 | 0.046 | ± 0.004 |                       |
|          | WT-FAS | 0.349 | ± 0.031 | 0.118 | ± 0.006 |                       |
|          | KO-FAS | 0.655 | ± 0.058 | 0.201 | ± 0.01  | <b>20:4_20:4_22:6</b> |

---

**Supplementary Table IV.** Summary of DG species determined by LC-MS/MS in murine hepatocyte LDs from WT and ATGL-KO mice. Samples investigated are from WT-FED, KO- FED, WT-FAS and KO-FAS groups. Absolute amounts (n=3 animals) are calculated in nmol, and are normalized to gram total acylglycerols (Infinity™ Triglycerides Reagent kit). Corresponding ‰ values are relative to total amount of DG species. Molecular species are derived from possible fatty acyl combinations as determined by fatty acid fragment ions (neutral losses) detected in the corresponding product ion spectra. Fatty acyls in bold are major compositions. n.d., not detected.

| Species |        | nmol / g |            | ‰      |        | Molecular species |           |
|---------|--------|----------|------------|--------|--------|-------------------|-----------|
| DG 32:0 | WT-FED | 51.914   | ± 8.403    | 4.42   | ± 0.41 |                   |           |
|         | KO-FED | 119.203  | ± 13.445   | 3.47   | ± 0.21 |                   |           |
|         | WT-FAS | 192.258  | ± 12.426   | 3.97   | ± 0.05 |                   |           |
|         | KO-FAS | 62.292   | ± 8.369    | 3.01   | ± 0.18 |                   |           |
| DG 32:1 | WT-FED | 82.217   | ± 8.008    | 7.03   | ± 0.41 |                   |           |
|         | KO-FED | 347.967  | ± 42.538   | 10.11  | ± 0.33 |                   |           |
|         | WT-FAS | 259.077  | ± 5.053    | 5.36   | ± 0.3  |                   |           |
|         | KO-FAS | 172.239  | ± 10.067   | 8.35   | ± 0.43 |                   |           |
| DG 32:2 | WT-FED | 29.373   | ± 9.704    | 2.48   | ± 0.66 |                   |           |
|         | KO-FED | 117.11   | ± 14.771   | 3.4    | ± 0.1  |                   |           |
|         | WT-FAS | 147.034  | ± 28.322   | 3.02   | ± 0.44 |                   |           |
|         | KO-FAS | 75.538   | ± 6.553    | 3.66   | ± 0.25 |                   |           |
| DG 34:0 | WT-FED | 63.529   | ± 13.842   | 5.42   | ± 1.01 | <b>16:0_18:0</b>  |           |
|         | KO-FED | 75.888   | ± 13.367   | 2.21   | ± 0.33 | <b>16:0_18:0</b>  |           |
|         | WT-FAS | 76.221   | ± 6.315    | 1.57   | ± 0.07 |                   |           |
|         | KO-FAS | 46.713   | ± 7.767    | 2.25   | ± 0.2  | <b>16:0_18:0</b>  |           |
| DG 34:1 | WT-FED | 1529.47  | ± 130.153  | 130.71 | ± 2.06 | <b>16:0_18:1</b>  |           |
|         | KO-FED | 5830.024 | ± 900.09   | 168.88 | ± 1.42 | <b>16:0_18:1</b>  |           |
|         | WT-FAS | 3715.71  | ± 172.522  | 76.82  | ± 1.13 | <b>16:0_18:1</b>  |           |
|         | KO-FAS | 2709.914 | ± 289.539  | 130.99 | ± 3.93 | <b>16:0_18:1</b>  |           |
| DG 34:2 | WT-FED | 1770.129 | ± 157.381  | 151.25 | ± 2.87 | <b>16:0_18:2</b>  | 16:1_18:1 |
|         | KO-FED | 7659.64  | ± 1138.242 | 222.02 | ± 1.13 | <b>16:0_18:2</b>  | 16:1_18:1 |
|         | WT-FAS | 8192.118 | ± 497.8    | 169.28 | ± 1.06 | <b>16:0_18:2</b>  | 16:1_18:1 |
|         | KO-FAS | 4381.924 | ± 360.71   | 212.09 | ± 2.33 | <b>16:0_18:2</b>  | 16:1_18:1 |
| DG 34:3 | WT-FED | 260.646  | ± 47.695   | 22.17  | ± 2.53 |                   |           |
|         | KO-FED | 893.104  | ± 141.954  | 25.87  | ± 0.64 | <b>16:1_18:2</b>  |           |
|         | WT-FAS | 1107.354 | ± 63.041   | 22.89  | ± 0.35 | <b>16:1_18:2</b>  |           |
|         | KO-FAS | 521.103  | ± 33.405   | 25.25  | ± 0.83 | <b>16:1_18:2</b>  |           |

DG continued

|         |        |           |   |         |        |   |       |                  |                  |                  |
|---------|--------|-----------|---|---------|--------|---|-------|------------------|------------------|------------------|
| DG 34:4 | WT-FED | 4.229     | ± | 1.118   | 0.36   | ± | 0.09  |                  |                  |                  |
|         | KO-FED | 37.584    | ± | 2.884   | 1.1    | ± | 0.09  |                  |                  |                  |
|         | WT-FAS | 125.524   | ± | 7.71    | 2.59   | ± | 0.07  |                  |                  |                  |
|         | KO-FAS | 18.525    | ± | 8.007   | 0.89   | ± | 0.37  |                  |                  |                  |
| DG 34:5 | WT-FED | n.d.      |   |         | n.d.   |   |       |                  |                  |                  |
|         | KO-FED | 0.53      | ± | 0.12    | 0.01   | ± | 0.000 |                  |                  |                  |
|         | WT-FAS | 12.39     | ± | 3.268   | 0.26   | ± | 0.08  |                  |                  |                  |
|         | KO-FAS | 1.459     |   |         | 0.08   |   |       |                  |                  |                  |
| DG 36:1 | WT-FED | 179.332   | ± | 10.459  | 15.38  | ± | 1.18  | <b>18:0_18:1</b> |                  |                  |
|         | KO-FED | 425.989   | ± | 55.2    | 12.38  | ± | 0.37  | <b>18:0_18:1</b> |                  |                  |
|         | WT-FAS | 418.607   | ± | 32.125  | 8.65   | ± | 0.41  | <b>18:0_18:1</b> |                  |                  |
|         | KO-FAS | 199.303   | ± | 16.124  | 9.65   | ± | 0.07  | <b>18:0_18:1</b> | 16:0_20:1        |                  |
| DG 36:2 | WT-FED | 1553.973  | ± | 90.08   | 133    | ± | 3.25  | <b>18:1_18:1</b> | 18:0_18:2        |                  |
|         | KO-FED | 4461.306  | ± | 713.125 | 129.15 | ± | 2.52  | <b>18:1_18:1</b> | 18:0_18:2        |                  |
|         | WT-FAS | 5276.122  | ± | 404.742 | 108.96 | ± | 2.2   | <b>18:1_18:1</b> | 18:0_18:2        |                  |
|         | KO-FAS | 2086.671  | ± | 209.682 | 100.9  | ± | 2.38  | <b>18:1_18:1</b> | 18:0_18:2        |                  |
| DG 36:3 | WT-FED | 1905.217  | ± | 96.049  | 163.11 | ± | 4.02  | <b>18:1_18:2</b> |                  |                  |
|         | KO-FED | 5789.801  | ± | 847.78  | 167.86 | ± | 1.14  | <b>18:1_18:2</b> |                  |                  |
|         | WT-FAS | 12245.047 | ± | 656.061 | 253.1  | ± | 3.17  | <b>18:1_18:2</b> |                  |                  |
|         | KO-FAS | 3152.352  | ± | 210.482 | 152.7  | ± | 2.06  | <b>18:1_18:2</b> |                  |                  |
| DG 36:4 | WT-FED | 1109.787  | ± | 51.96   | 95.03  | ± | 2.92  | <b>16:0_20:4</b> | <b>18:2_18:2</b> | 18:1_18:3        |
|         | KO-FED | 2686.717  | ± | 425.999 | 77.81  | ± | 1.28  | <b>16:0_20:4</b> | 18:2_18:2        | 18:1_18:3        |
|         | WT-FAS | 6399.752  | ± | 347.748 | 132.28 | ± | 2.2   | <b>16:0_20:4</b> | <b>18:2_18:2</b> | 18:1_18:3        |
|         | KO-FAS | 1709.762  | ± | 124.452 | 82.79  | ± | 0.77  | <b>16:0_20:4</b> | 18:2_18:2        | 18:1_18:3        |
| DG 36:5 | WT-FED | 103.711   | ± | 9.522   | 8.86   | ± | 0.23  |                  |                  |                  |
|         | KO-FED | 292.799   | ± | 48.755  | 8.47   | ± | 0.17  |                  |                  |                  |
|         | WT-FAS | 508.694   | ± | 21.825  | 10.52  | ± | 0.15  | <b>18:2_18:3</b> |                  |                  |
|         | KO-FAS | 219.634   | ± | 12.651  | 10.65  | ± | 0.49  |                  |                  |                  |
| DG 38:1 | WT-FED | 5.653     | ± | 2.293   | 0.48   | ± | 0.19  |                  |                  |                  |
|         | KO-FED | 9.991     | ± | 1.352   | 0.3    | ± | 0.09  |                  |                  |                  |
|         | WT-FAS | 26.036    | ± | 2.863   | 0.54   | ± | 0.05  |                  |                  |                  |
|         | KO-FAS | 6.452     | ± | 3.068   | 0.32   | ± | 0.18  |                  |                  |                  |
| DG 38:2 | WT-FED | 130.807   | ± | 6.522   | 11.2   | ± | 0.53  |                  |                  |                  |
|         | KO-FED | 178.501   | ± | 18.909  | 5.2    | ± | 0.25  |                  |                  |                  |
|         | WT-FAS | 235.232   | ± | 16.382  | 4.86   | ± | 0.07  | <b>18:1_20:1</b> | <b>18:2_20:0</b> |                  |
|         | KO-FAS | 82.605    | ± | 4.054   | 4.01   | ± | 0.19  |                  |                  |                  |
| DG 38:3 | WT-FED | 281.62    | ± | 18.836  | 24.11  | ± | 1.28  |                  |                  |                  |
|         | KO-FED | 435.758   | ± | 68.606  | 12.62  | ± | 0.22  |                  |                  |                  |
|         | WT-FAS | 542.774   | ± | 54.791  | 11.2   | ± | 0.54  | <b>18:2_20:1</b> | 18:1_20:2        |                  |
|         | KO-FAS | 188.802   | ± | 18.383  | 9.14   | ± | 0.37  | <b>18:2_20:1</b> | <b>16:1_22:2</b> | <b>18:1_20:2</b> |
| DG 38:4 | WT-FED | 768.202   | ± | 69.137  | 65.64  | ± | 1.34  | <b>18:0_20:4</b> |                  |                  |
|         | KO-FED | 1777.776  | ± | 281.22  | 51.48  | ± | 1.43  | <b>18:0_20:4</b> | 18:1_20:3        |                  |
|         | WT-FAS | 1413.709  | ± | 72.697  | 29.23  | ± | 0.58  | <b>18:0_20:4</b> | 18:1_20:3        |                  |
|         | KO-FAS | 1347.37   | ± | 135.128 | 65.16  | ± | 1.63  | <b>18:0_20:4</b> | 18:1_20:3        |                  |



DG continued

|         |        |          |           |       |        |                  |                  |
|---------|--------|----------|-----------|-------|--------|------------------|------------------|
| DG 38:5 | WT-FED | 410.198  | ± 27.36   | 35.15 | ± 2.52 |                  |                  |
|         | KO-FED | 833.874  | ± 103.018 | 24.24 | ± 1    |                  |                  |
|         | WT-FAS | 1506.512 | ± 84.388  | 31.14 | ± 0.16 | <b>18:1_20:4</b> |                  |
|         | KO-FAS | 737.617  | ± 37.123  | 35.78 | ± 1.67 | <b>18:1_20:4</b> |                  |
| DG 38:6 | WT-FED | 582.303  | ± 59.746  | 49.73 | ± 1.81 |                  |                  |
|         | KO-FED | 1197.859 | ± 195.47  | 34.69 | ± 1.09 | <b>18:2_20:4</b> | <b>16:0_22:6</b> |
|         | WT-FAS | 2819.477 | ± 136.788 | 58.29 | ± 0.56 | <b>16:0_22:6</b> | 18:2_20:4        |
|         | KO-FAS | 1201.441 | ± 82.41   | 58.2  | ± 1    | <b>18:2_20:4</b> | 16:0_22:6        |
| DG 38:7 | WT-FED | 25.449   | ± 2.976   | 2.2   | ± 0.41 |                  |                  |
|         | KO-FED | 70.569   | ± 10.05   | 2.05  | ± 0.15 |                  |                  |
|         | WT-FAS | 125.574  | ± 13.282  | 2.6   | ± 0.26 |                  |                  |
|         | KO-FAS | 66.318   | ± 7.294   | 3.21  | ± 0.14 |                  |                  |
| DG 40:4 | WT-FED | 219.472  | ± 19.929  | 18.75 | ± 0.41 |                  |                  |
|         | KO-FED | 453.794  | ± 69.711  | 13.18 | ± 1.01 |                  |                  |
|         | WT-FAS | 267.108  | ± 18.837  | 5.52  | ± 0.16 |                  |                  |
|         | KO-FAS | 473.284  | ± 41.437  | 22.91 | ± 0.82 |                  |                  |
| DG 40:5 | WT-FED | 26.353   | ± 1.625   | 2.34  | ± 0.31 |                  |                  |
|         | KO-FED | 52.493   | ± 12.122  | 1.51  | ± 0.17 |                  |                  |
|         | WT-FAS | 250.278  | ± 6.747   | 5.18  | ± 0.25 |                  |                  |
|         | KO-FAS | 55.19    | ± 22.529  | 2.63  | ± 0.88 |                  |                  |
| DG 40:6 | WT-FED | 139.927  | ± 39.733  | 11.85 | ± 2.71 |                  |                  |
|         | KO-FED | 266.85   | ± 44.73   | 7.73  | ± 0.42 | <b>18:0_22:6</b> | <b>18:1_22:5</b> |
|         | WT-FAS | 727.447  | ± 77.417  | 15.01 | ± 0.78 | <b>18:0_22:6</b> | <b>18:1_22:5</b> |
|         | KO-FAS | 252.016  | ± 13.031  | 12.22 | ± 0.41 | <b>18:0_22:6</b> | <b>18:1_22:5</b> |
| DG 40:7 | WT-FED | 305.628  | ± 18.537  | 26.17 | ± 1.17 | <b>20:2_20:5</b> |                  |
|         | KO-FED | 336.047  | ± 63.16   | 9.7   | ± 0.41 | <b>20:2_20:5</b> |                  |
|         | WT-FAS | 1237.714 | ± 69.531  | 25.58 | ± 0.37 | <b>20:2_20:5</b> |                  |
|         | KO-FAS | 498.012  | ± 6.473   | 24.2  | ± 1.75 | <b>20:2_20:5</b> |                  |
| DG 40:8 | WT-FED | 154.166  | ± 18.175  | 13.15 | ± 0.63 |                  |                  |
|         | KO-FED | 157.285  | ± 24.236  | 4.56  | ± 0.08 |                  |                  |
|         | WT-FAS | 560.171  | ± 21.934  | 11.59 | ± 0.26 | <b>18:2_22:6</b> |                  |
|         | KO-FAS | 390.314  | ± 5.643   | 18.98 | ± 1.62 | <b>18:2_22:6</b> | 20:4_20:4        |

**Supplementary Table V.** Summary of PC species determined by LC-MS/MS in murine hepatocyte LDs from WT and ATGL-KO mice. Samples investigated are from WT-FED, KO- FED, WT-FAS and KO-FAS groups. Absolute amounts (n=3 animals) are calculated in nmol, and are normalized to gram total acylglycerols (Infinity™ Triglycerides Reagent kit). Corresponding ‰ values are relative to total amount of PC species. Molecular species are derived from possible fatty acyl combinations as determined by fatty acid fragment ions (neutral losses) detected in the corresponding product ion spectra. Fatty acyls in bold are major compositions.

| Species |        | nmol / g |           | ‰      |        | Molecular species |
|---------|--------|----------|-----------|--------|--------|-------------------|
| PC 32:0 | WT-FED | 98.564   | ± 4.211   | 4.28   | ± 0.09 |                   |
|         | KO-FED | 57.155   | ± 8.221   | 3.67   | ± 0.28 |                   |
|         | WT-FAS | 21.081   | ± 1.17    | 1.35   | ± 0.03 |                   |
|         | KO-FAS | 22.756   | ± 5.231   | 2.07   | ± 0.31 |                   |
| PC 32:1 | WT-FED | 141.163  | ± 11.166  | 6.13   | ± 0.41 | <b>16:0_16:1</b>  |
|         | KO-FED | 47.298   | ± 7.002   | 3.03   | ± 0.15 |                   |
|         | WT-FAS | 41.707   | ± 2.826   | 2.68   | ± 0.23 | <b>16:0_16:1</b>  |
|         | KO-FAS | 36.805   | ± 3.931   | 3.38   | ± 0.35 |                   |
| PC 32:2 | WT-FED | 31.96    | ± 1.235   | 1.39   | ± 0.08 |                   |
|         | KO-FED | 14.656   | ± 1.349   | 0.95   | ± 0.1  |                   |
|         | WT-FAS | 16.847   | ± 1.751   | 1.08   | ± 0.08 |                   |
|         | KO-FAS | 11.367   | ± 0.166   | 1.05   | ± 0.08 |                   |
| PC 34:1 | WT-FED | 1940.924 | ± 116.992 | 84.26  | ± 0.66 | <b>16:0_18:1</b>  |
|         | KO-FED | 1022.231 | ± 182.146 | 65.24  | ± 0.69 | <b>16:0_18:1</b>  |
|         | WT-FAS | 1194.115 | ± 35.455  | 76.79  | ± 1.3  | <b>16:0_18:1</b>  |
|         | KO-FAS | 817.761  | ± 85.945  | 74.84  | ± 2.71 | <b>16:0_18:1</b>  |
| PC 34:2 | WT-FED | 5080.608 | ± 295.383 | 220.59 | ± 2.33 | <b>16:0_18:2</b>  |
|         | KO-FED | 2692.703 | ± 478.547 | 171.87 | ± 2.74 | <b>16:0_18:2</b>  |
|         | WT-FAS | 3993.921 | ± 190.141 | 256.77 | ± 7.72 | <b>16:0_18:2</b>  |
|         | KO-FAS | 3136.957 | ± 257.431 | 287.39 | ± 3.29 | <b>16:0_18:2</b>  |
| PC 34:3 | WT-FED | 361.965  | ± 23.278  | 15.72  | ± 0.48 | <b>16:1_18:2</b>  |
|         | KO-FED | 180.674  | ± 35.153  | 11.52  | ± 0.67 | <b>16:1_18:2</b>  |
|         | WT-FAS | 218.481  | ± 14.102  | 14.04  | ± 0.57 | <b>16:1_18:2</b>  |
|         | KO-FAS | 155.08   | ± 11.259  | 14.22  | ± 0.32 | <b>16:1_18:2</b>  |
| PC 34:4 | WT-FED | 16.294   | ± 0.993   | 0.71   | ± 0.01 |                   |
|         | KO-FED | 12.124   | ± 2.274   | 0.77   | ± 0.02 |                   |
|         | WT-FAS | 14.896   | ± 0.816   | 0.96   | ± 0.03 | <b>16:1_18:3</b>  |
|         | KO-FAS | 6.103    | ± 0.712   | 0.56   | ± 0.05 |                   |
| PC 36:1 | WT-FED | 222.364  | ± 3.083   | 9.67   | ± 0.49 | <b>18:0_18:1</b>  |
|         | KO-FED | 152.826  | ± 29.153  | 9.75   | ± 0.5  | <b>18:0_18:1</b>  |
|         | WT-FAS | 95.309   | ± 12.857  | 6.13   | ± 0.79 | <b>18:0_18:1</b>  |
|         | KO-FAS | 75.826   | ± 3.213   | 6.96   | ± 0.25 |                   |

## PC continued

|         |        |          |           |        |        |                  |           |
|---------|--------|----------|-----------|--------|--------|------------------|-----------|
| PC 36:2 | WT-FED | 2110.659 | ± 136.02  | 91.61  | ± 0.63 | <b>18:0_18:2</b> | 18:1/18:1 |
|         | KO-FED | 1865.188 | ± 343.304 | 118.96 | ± 1.76 | <b>18:0_18:2</b> | 18:1/18:1 |
|         | WT-FAS | 1497.539 | ± 22.908  | 96.33  | ± 2.09 | <b>18:0_18:2</b> | 18:1/18:1 |
|         | KO-FAS | 859.183  | ± 71.063  | 78.71  | ± 0.72 | <b>18:0_18:2</b> | 18:1/18:1 |
| PC 36:3 | WT-FED | 1228.534 | ± 67.744  | 53.35  | ± 0.53 | <b>16:0_20:3</b> | 18:1_18:2 |
|         | KO-FED | 856.146  | ± 157.446 | 54.6   | ± 0.89 | <b>16:0_20:3</b> | 18:1_18:2 |
|         | WT-FAS | 817.336  | ± 46.346  | 52.53  | ± 1.41 | <b>16:0_20:3</b> | 18:1_18:2 |
|         | KO-FAS | 540.708  | ± 42.68   | 49.54  | ± 0.57 | <b>16:0_20:3</b> | 18:1_18:2 |
| PC 36:4 | WT-FED | 3537.019 | ± 267.348 | 153.45 | ± 2.34 | <b>16:0_20:4</b> |           |
|         | KO-FED | 2427.915 | ± 444.433 | 154.88 | ± 2.82 | <b>16:0_20:4</b> | 18:2/18:2 |
|         | WT-FAS | 2236.241 | ± 85.146  | 143.77 | ± 1.75 | <b>16:0_20:4</b> | 18:2/18:2 |
|         | KO-FAS | 1758.889 | ± 155.176 | 161.1  | ± 3.2  | <b>16:0_20:4</b> | 18:2/18:2 |
| PC 36:5 | WT-FED | 140.43   | ± 8.896   | 6.1    | ± 0.1  | <b>18:2_18:3</b> |           |
|         | KO-FED | 103.877  | ± 21.036  | 6.61   | ± 0.21 | <b>18:2_18:3</b> |           |
|         | WT-FAS | 75.316   | ± 1.254   | 4.84   | ± 0.1  | <b>18:2_18:3</b> |           |
|         | KO-FAS | 94.324   | ± 8.354   | 8.64   | ± 0.4  | <b>18:2_18:3</b> |           |
| PC 36:6 | WT-FED | 4.875    | ± 1.536   | 0.21   | ± 0.06 |                  |           |
|         | KO-FED | 5.468    | ± 1.62    | 0.35   | ± 0.06 |                  |           |
|         | WT-FAS | 5.597    | ± 0.461   | 0.36   | ± 0.02 |                  |           |
|         | KO-FAS | 2.212    | ± 0.537   | 0.2    | ± 0.04 |                  |           |
| PC 38:2 | WT-FED | 40.332   | ± 4.417   | 1.75   | ± 0.18 |                  |           |
|         | KO-FED | 22.56    | ± 6.308   | 1.5    | ± 0.62 |                  |           |
|         | WT-FAS | 5.189    | ± 1.237   | 0.33   | ± 0.08 |                  |           |
|         | KO-FAS | 3.647    | ± 1.874   | 0.33   | ± 0.15 |                  |           |
| PC 38:3 | WT-FED | 359.946  | ± 94.661  | 15.73  | ± 4.43 | <b>18:0_20:3</b> |           |
|         | KO-FED | 271.561  | ± 41.035  | 17.89  | ± 5.3  | <b>18:0_20:3</b> |           |
|         | WT-FAS | 139.532  | ± 47.22   | 8.94   | ± 2.91 | <b>18:0_20:3</b> |           |
|         | KO-FAS | 79.896   | ± 10.544  | 7.31   | ± 0.7  | <b>18:0_20:3</b> |           |
| PC 38:4 | WT-FED | 2351.63  | ± 169.992 | 102.04 | ± 1.6  | <b>18:0_20:4</b> |           |
|         | KO-FED | 2218.489 | ± 385.522 | 141.65 | ± 4.32 | <b>18:0_20:4</b> |           |
|         | WT-FAS | 1373.094 | ± 56.827  | 88.28  | ± 2.19 | <b>18:0_20:4</b> |           |
|         | KO-FAS | 1110.789 | ± 58.255  | 101.92 | ± 3.09 | <b>18:0_20:4</b> |           |
| PC 38:5 | WT-FED | 997.738  | ± 63.299  | 43.31  | ± 0.39 | <b>16:0_22:5</b> |           |
|         | KO-FED | 780.158  | ± 135.466 | 49.81  | ± 0.86 | <b>16:0_22:5</b> |           |
|         | WT-FAS | 567.149  | ± 29.809  | 36.45  | ± 0.94 | <b>16:0_22:5</b> | 18:1_20:4 |
|         | KO-FAS | 420.06   | ± 27.879  | 38.51  | ± 0.52 | <b>16:0_22:5</b> | 18:1_20:4 |
| PC 38:6 | WT-FED | 3078.067 | ± 224.432 | 133.57 | ± 2.37 | <b>16:0_22:6</b> |           |
|         | KO-FED | 1893.114 | ± 339.189 | 120.79 | ± 2.21 | <b>16:0_22:6</b> | 18:2_20:4 |
|         | WT-FAS | 2295.753 | ± 64.777  | 147.65 | ± 3.51 | <b>16:0_22:6</b> | 18:2_20:4 |
|         | KO-FAS | 1166.834 | ± 76.832  | 106.99 | ± 2.08 | <b>16:0_22:6</b> | 18:2_20:4 |
| PC 38:7 | WT-FED | 76.68    | ± 5.623   | 3.33   | ± 0.06 | <b>16:1_22:6</b> | 18:2_20:4 |
|         | KO-FED | 54.838   | ± 10.233  | 3.5    | ± 0.07 |                  |           |
|         | WT-FAS | 42.912   | ± 1.681   | 2.76   | ± 0.07 | <b>16:1_22:6</b> |           |
|         | KO-FAS | 34.254   | ± 3.047   | 3.14   | ± 0.04 |                  |           |

PC continued

|    |      |        |         |   |        |       |   |      |                  |                  |
|----|------|--------|---------|---|--------|-------|---|------|------------------|------------------|
| PC | 40:4 | WT-FED | 23.968  | ± | 5.984  | 1.03  | ± | 0.21 |                  |                  |
|    |      | KO-FED | 14.727  | ± | 3.991  | 0.94  | ± | 0.15 |                  |                  |
|    |      | WT-FAS | 6.488   | ± | 2.117  | 0.42  | ± | 0.15 |                  |                  |
|    |      | KO-FAS | 4.268   | ± | 0.874  | 0.4   | ± | 0.11 |                  |                  |
| PC | 40:5 | WT-FED | 104.147 | ± | 61.748 | 4.53  | ± | 2.6  |                  |                  |
|    |      | KO-FED | 93.773  | ± | 6.792  | 6.15  | ± | 1.4  |                  |                  |
|    |      | WT-FAS | 59.353  | ± | 25.715 | 3.8   | ± | 1.56 |                  |                  |
|    |      | KO-FAS | 50.374  | ± | 8.249  | 4.62  | ± | 0.72 |                  |                  |
| PC | 40:6 | WT-FED | 699.682 | ± | 47.639 | 30.37 | ± | 0.45 | <b>18:0_22:6</b> | 20:2_20:4        |
|    |      | KO-FED | 551.112 | ± | 92.842 | 35.21 | ± | 0.72 | <b>18:0_22:6</b> | 20:2_20:4        |
|    |      | WT-FAS | 582.925 | ± | 12.891 | 37.49 | ± | 0.86 | <b>18:0_22:6</b> |                  |
|    |      | KO-FAS | 316.611 | ± | 28.2   | 29    | ± | 0.93 | <b>18:0_22:6</b> |                  |
| PC | 40:7 | WT-FED | 317.19  | ± | 25.51  | 13.76 | ± | 0.3  | <b>18:1_22:6</b> |                  |
|    |      | KO-FED | 239.734 | ± | 42.411 | 15.3  | ± | 0.53 | <b>18:1_22:6</b> |                  |
|    |      | WT-FAS | 196.176 | ± | 9.154  | 12.61 | ± | 0.28 | <b>18:1_22:6</b> |                  |
|    |      | KO-FAS | 125.475 | ± | 13.505 | 11.48 | ± | 0.33 | <b>18:1_22:6</b> |                  |
| PC | 40:8 | WT-FED | 71.576  | ± | 6.902  | 3.1   | ± | 0.13 | <b>18:2_22:6</b> | <b>20:4/20:4</b> |
|    |      | KO-FED | 79.548  | ± | 14.102 | 5.08  | ± | 0.12 | <b>18:2_22:6</b> | <b>20:4/20:4</b> |
|    |      | WT-FAS | 56.257  | ± | 0.919  | 3.62  | ± | 0.08 | <b>18:2_22:6</b> | 20:4/20:4        |
|    |      | KO-FAS | 83.304  | ± | 5.366  | 7.64  | ± | 0.26 | <b>18:2_22:6</b> |                  |

**Supplementary Table VI.** Summary of LPC species determined by LC-MS/MS in murine hepatocyte LDs from WT and ATGL-KO mice. Samples investigated are from WT-FED, KO-FED, WT-FAS and KO-FAS groups. Absolute amounts were not calculated as internal standards were not applied. ‰ Values (n=3 animals) are relative to total amount of LPC species.

| Species  |        |  | ‰                |
|----------|--------|--|------------------|
| LPC 16:0 | WT-FED |  | 361.814 ± 29.277 |
|          | KO-FED |  | 241.564 ± 7.626  |
|          | WT-FAS |  | 367.454 ± 6.466  |
|          | KO-FAS |  | 300.904 ± 12.061 |
| LPC 16:1 | WT-FED |  | 7.057 ± 6.822    |
|          | KO-FED |  | 4.55 ± 2.181     |
|          | WT-FAS |  | 4.553 ± 2.137    |
|          | KO-FAS |  | 5.396 ± 3.437    |
| LPC 18:0 | WT-FED |  | 141.12 ± 17.361  |
|          | KO-FED |  | 121.668 ± 2.941  |
|          | WT-FAS |  | 116.878 ± 3.359  |
|          | KO-FAS |  | 85.613 ± 3.113   |
| LPC 18:1 | WT-FED |  | 72.485 ± 4.685   |
|          | KO-FED |  | 71.051 ± 2.53    |
|          | WT-FAS |  | 67.248 ± 2.154   |
|          | KO-FAS |  | 63.956 ± 1.389   |
| LPC 18:2 | WT-FED |  | 150.531 ± 32.878 |
|          | KO-FED |  | 193.088 ± 5.997  |
|          | WT-FAS |  | 198.559 ± 7.025  |
|          | KO-FAS |  | 225.402 ± 4.095  |
| LPC 20:0 | WT-FED |  | 4.073 ± 3.607    |
|          | KO-FED |  | 1.222 ± 0.363    |
|          | WT-FAS |  | 0.778 ± 0.329    |
|          | KO-FAS |  | 0.125            |
| LPC 20:1 | WT-FED |  | 1.868 ± 0.385    |
|          | KO-FED |  | 2.16 ± 1.259     |
|          | WT-FAS |  | 0.871 ± 0.438    |
|          | KO-FAS |  | 0.965            |
| LPC 20:2 | WT-FED |  | 1.339 ± 1.347    |
|          | KO-FED |  | 2.099 ± 1.241    |
|          | WT-FAS |  | 0.501 ± 0.455    |
|          | KO-FAS |  | 0.442 ± 0.081    |

## LPC continued

---

|     |      |        |                 |
|-----|------|--------|-----------------|
| LPC | 20:3 | WT-FED | 13.59 ± 2.441   |
|     |      | KO-FED | 15.373 ± 0.78   |
|     |      | WT-FAS | 3.812 ± 0.527   |
|     |      | KO-FAS | 5.445 ± 2.144   |
| LPC | 20:4 | WT-FED | 114.24 ± 20.994 |
|     |      | KO-FED | 186.109 ± 5.857 |
|     |      | WT-FAS | 94.267 ± 1.293  |
|     |      | KO-FAS | 172.439 ± 9.241 |
| LPC | 22:5 | WT-FED | 5.794 ± 2.022   |
|     |      | KO-FED | 8.259 ± 1.279   |
|     |      | WT-FAS | 7.657 ± 0.653   |
|     |      | KO-FAS | 7.337 ± 3.121   |
| LPC | 22:6 | WT-FED | 126.086 ± 7.747 |
|     |      | KO-FED | 152.859 ± 9.771 |
|     |      | WT-FAS | 137.422 ± 2.645 |
|     |      | KO-FAS | 131.976 ± 6.681 |

---

**Supplementary TableVII.** Summary of PE species determined by LC-MS/MS in murine hepatocyte LDs from WT and ATGL-KO mice. Samples investigated are from WT-FED, KO- FED, WT-FAS and KO-FAS groups. Absolute amounts (n=3 animals) are calculated in nmol, and are normalized to gram total acylglycerols (Infinity™ Triglycerides Reagent kit). Corresponding ‰ values are relative to total amounts of PE species. Molecular species are derived from possible fatty acyl combinations as determined by fatty acid fragment ions (neutral losses) detected in the corresponding product ion spectra. Fatty acyls in bold are major compositions.

| Species |        |  | nmol / g           |  | ‰              |                  | Molecular species |  |
|---------|--------|--|--------------------|--|----------------|------------------|-------------------|--|
| PE 34:2 | WT-FED |  | 699.009 ± 66.569   |  | 50.9 ± 2.56    |                  |                   |  |
|         | KO-FED |  | 437.957 ± 52.423   |  | 43.76 ± 3.86   | <b>16:0_18:2</b> |                   |  |
|         | WT-FAS |  | 544.954 ± 45.158   |  | 57.55 ± 3.78   | <b>16:0_18:2</b> |                   |  |
|         | KO-FAS |  | 337.832 ± 24.72    |  | 34.38 ± 1.3    |                  |                   |  |
| PE 34:3 | WT-FED |  | 45.952 ± 20.356    |  | 3.27 ± 1.08    |                  |                   |  |
|         | KO-FED |  | 19.449 ± 4.353     |  | 1.92 ± 0.1     |                  |                   |  |
|         | WT-FAS |  | 32.115 ± 8.155     |  | 3.4 ± 0.86     |                  |                   |  |
|         | KO-FAS |  | 13.826 ± 11.656    |  | 1.45 ± 1.23    |                  |                   |  |
| PE 36:2 | WT-FED |  | 589.166 ± 74.881   |  | 42.78 ± 1.2    |                  |                   |  |
|         | KO-FED |  | 416.06 ± 88.015    |  | 41.1 ± 1.59    |                  |                   |  |
|         | WT-FAS |  | 655.897 ± 22.077   |  | 69.33 ± 2.54   |                  |                   |  |
|         | KO-FAS |  | 286.913 ± 18.834   |  | 29.19 ± 0.38   |                  |                   |  |
| PE 36:3 | WT-FED |  | 324.779 ± 49.216   |  | 23.55 ± 1.08   |                  |                   |  |
|         | KO-FED |  | 231.54 ± 30.118    |  | 23.11 ± 2.02   |                  |                   |  |
|         | WT-FAS |  | 247.555 ± 21.099   |  | 26.14 ± 1.78   | <b>18:1_18:2</b> |                   |  |
|         | KO-FAS |  | 160.108 ± 14.228   |  | 16.28 ± 0.58   |                  |                   |  |
| PE 36:4 | WT-FED |  | 1224.971 ± 135.987 |  | 89.04 ± 1.15   | <b>16:0_20:4</b> | <b>18:2/18:2</b>  |  |
|         | KO-FED |  | 808.465 ± 157.775  |  | 80.02 ± 2.31   | <b>16:0_20:4</b> |                   |  |
|         | WT-FAS |  | 551.558 ± 63.329   |  | 58.23 ± 5.66   | <b>16:0_20:4</b> |                   |  |
|         | KO-FAS |  | 836.461 ± 54.053   |  | 85.14 ± 2.92   | <b>16:0_20:4</b> |                   |  |
| PE 36:5 | WT-FED |  | 130.464 ± 22.388   |  | 9.44 ± 0.5     |                  |                   |  |
|         | KO-FED |  | 58.328 ± 21.184    |  | 5.77 ± 2.03    |                  |                   |  |
|         | WT-FAS |  | 54.875 ± 5.132     |  | 5.8 ± 0.51     |                  |                   |  |
|         | KO-FAS |  | 52.143 ± 8.923     |  | 5.35 ± 1.15    |                  |                   |  |
| PE 38:4 | WT-FED |  | 4712.432 ± 593.43  |  | 342.15 ± 3.91  | <b>18:0_20:4</b> |                   |  |
|         | KO-FED |  | 4283.978 ± 761.494 |  | 424.74 ± 4.21  | <b>18:0_20:4</b> |                   |  |
|         | WT-FAS |  | 3263.695 ± 194.323 |  | 344.82 ± 16.92 | <b>18:0_20:4</b> |                   |  |
|         | KO-FAS |  | 4574.875 ± 281.416 |  | 465.56 ± 5.26  | <b>18:0_20:4</b> |                   |  |
| PE 38:5 | WT-FED |  | 1082.152 ± 83.446  |  | 78.86 ± 3.13   | <b>18:1_20:4</b> |                   |  |
|         | KO-FED |  | 814.582 ± 147.187  |  | 80.8 ± 3.92    | <b>18:1_20:4</b> |                   |  |
|         | WT-FAS |  | 660.522 ± 29.609   |  | 69.8 ± 2.73    | <b>18:1_20:4</b> |                   |  |
|         | KO-FAS |  | 841.453 ± 44.277   |  | 85.66 ± 0.79   |                  |                   |  |

## PE continued

---

|    |      |        |          |   |         |        |   |       |                  |
|----|------|--------|----------|---|---------|--------|---|-------|------------------|
| PE | 38:6 | WT-FED | 2925.293 | ± | 350.721 | 212.49 | ± | 3.46  |                  |
|    |      | KO-FED | 1714.302 | ± | 284.06  | 170.18 | ± | 1.73  |                  |
|    |      | WT-FAS | 1645.004 | ± | 266.503 | 174.36 | ± | 32.09 |                  |
|    |      | KO-FAS | 1440.51  | ± | 80.266  | 146.62 | ± | 1.6   |                  |
| PE | 38:7 | WT-FED | 114.1    | ± | 35.023  | 8.24   | ± | 2.08  |                  |
|    |      | KO-FED | 78.832   | ± | 14.666  | 7.85   | ± | 1.12  |                  |
|    |      | WT-FAS | 77.906   | ± | 6.579   | 8.24   | ± | 0.71  |                  |
|    |      | KO-FAS | 54.602   | ± | 4.076   | 5.55   | ± | 0.12  |                  |
| PE | 40:6 | WT-FED | 1239.541 | ± | 144.278 | 90.07  | ± | 1.51  | <b>18:0_22:6</b> |
|    |      | KO-FED | 763.516  | ± | 134.689 | 75.71  | ± | 0.75  | <b>18:0_22:6</b> |
|    |      | WT-FAS | 1196.21  | ± | 86.703  | 126.36 | ± | 7.56  | <b>18:0_22:6</b> |
|    |      | KO-FAS | 787.173  | ± | 22.31   | 80.22  | ± | 3.11  | <b>18:0_22:6</b> |
| PE | 40:7 | WT-FED | 654.26   | ± | 71.588  | 47.61  | ± | 2.72  |                  |
|    |      | KO-FED | 395.675  | ± | 70.214  | 39.23  | ± | 0.59  |                  |
|    |      | WT-FAS | 467.398  | ± | 21.655  | 49.39  | ± | 2.07  |                  |
|    |      | KO-FAS | 373.416  | ± | 25.719  | 37.99  | ± | 0.79  |                  |
| PE | 40:8 | WT-FED | 21.622   | ± | 5.856   | 1.61   | ± | 0.56  |                  |
|    |      | KO-FED | 58.674   | ± | 10.241  | 5.82   | ± | 0.09  |                  |
|    |      | WT-FAS | 62.256   | ± | 3.29    | 6.58   | ± | 0.42  |                  |
|    |      | KO-FAS | 64.88    | ± | 2.729   | 6.61   | ± | 0.27  |                  |

---



**Supplementary Table VIII.** Summary of PI species determined by LC-MS/MS in murine hepatocyte LDs from WT and ATGL-KO mice. Samples investigated are from WT-FED, KO- FED, WT-FAS and KO-FAS groups. Absolute amounts (n=3 animals) are calculated in nmol, and are normalized to gram total acylglycerols (Infinity™ Triglycerides Reagent kit). Corresponding ‰ values are relative to total amounts of PI species. Molecular species are derived from possible fatty acyl combinations as determined by fatty acid fragment ions (carboxylates) detected in the corresponding product ion spectra. Fatty acyls in bold are major compositions.

| Species |        | nmol / g           |  | ‰              |  | Molecular species                 |
|---------|--------|--------------------|--|----------------|--|-----------------------------------|
| PI 34:2 | WT-FED | 107.113 ± 29.703   |  | 20.14 ± 6.71   |  | <b>16:0_18:2</b>                  |
|         | KO-FED | 69.371 ± 11.109    |  | 18.24 ± 1.12   |  |                                   |
|         | WT-FAS | 52.771 ± 2.082     |  | 14.69 ± 0.47   |  | <b>16:0_18:2</b>                  |
|         | KO-FAS | 1.407 ± 1.049      |  | 0.42 ± 0.31    |  |                                   |
| PI 36:2 | WT-FED | 114.658 ± 34.417   |  | 20.46 ± 1.3    |  | <b>18:0_18:2</b> 18:1/18:1        |
|         | KO-FED | 55.372 ± 7.843     |  | 14.64 ± 1.82   |  | <b>18:0_18:2</b> <b>18:1/18:1</b> |
|         | WT-FAS | 54.227 ± 3.868     |  | 15.08 ± 0.62   |  | <b>18:0_18:2</b> 18:1/18:1        |
|         | KO-FAS | 1.497 ± 0.301      |  | 0.46 ± 0.11    |  |                                   |
| PI 36:3 | WT-FED | 103.016 ± 19.628   |  | 18.81 ± 1.88   |  | <b>16:0_20:3</b> 18:1_18:2        |
|         | KO-FED | 69.559 ± 14.855    |  | 18.52 ± 4.66   |  |                                   |
|         | WT-FAS | 46.226 ± 2.729     |  | 12.9 ± 1.31    |  | <b>16:0_20:3</b> <b>18:1_18:2</b> |
|         | KO-FAS | 35.304 ± 3.585     |  | 10.78 ± 1.05   |  |                                   |
| PI 36:4 | WT-FED | 444.565 ± 131.558  |  | 79.36 ± 6.37   |  | <b>16:0_20:4</b>                  |
|         | KO-FED | 314.867 ± 84.689   |  | 81.6 ± 5.97    |  | <b>16:0_20:4</b>                  |
|         | WT-FAS | 182.796 ± 7.921    |  | 50.89 ± 1.95   |  | <b>16:0_20:4</b> 18:2/18:2        |
|         | KO-FAS | 172.374 ± 12.941   |  | 52.62 ± 2.9    |  | <b>16:0_20:4</b>                  |
| PI 38:3 | WT-FED | 343.407 ± 77.327   |  | 66.9 ± 32.83   |  | <b>18:0_20:3</b>                  |
|         | KO-FED | 141.081 ± 20.292   |  | 38.33 ± 11.25  |  | <b>18:0_20:3</b>                  |
|         | WT-FAS | 127.467 ± 61.641   |  | 35.02 ± 16.02  |  | <b>18:0_20:3</b>                  |
|         | KO-FAS | 63.112 ± 46.27     |  | 19.08 ± 13.52  |  | <b>18:0_20:3</b>                  |
| PI 38:4 | WT-FED | 4247.33 ± 1240.064 |  | 759.05 ± 44.29 |  | <b>18:0_20:4</b>                  |
|         | KO-FED | 2971.426 ± 668.357 |  | 773.49 ± 26.61 |  | <b>18:0_20:4</b>                  |
|         | WT-FAS | 3004.313 ± 120.458 |  | 836.2 ± 20.08  |  | <b>18:0_20:4</b>                  |
|         | KO-FAS | 2851.549 ± 74.093  |  | 871.24 ± 23.93 |  | <b>18:0_20:4</b>                  |
| PI 38:5 | WT-FED | 134.281 ± 39.707   |  | 23.98 ± 2.1    |  | <b>18:1_20:4</b>                  |
|         | KO-FED | 180.627 ± 40.295   |  | 47.29 ± 5.14   |  | <b>18:1_20:4</b>                  |
|         | WT-FAS | 100.544 ± 6.952    |  | 28.07 ± 3.23   |  | <b>18:1_20:4</b>                  |
|         | KO-FAS | 143.378 ± 26.599   |  | 43.62 ± 6.62   |  | <b>18:1_20:4</b>                  |
| PI 38:6 | WT-FED | 20.495 ± 1.132     |  | 3.91 ± 1.29    |  |                                   |
|         | KO-FED | 12.442 ± 4.263     |  | 3.28 ± 1       |  | <b>18:2_20:4</b>                  |
|         | WT-FAS | 7.423 ± 0.479      |  | 2.07 ± 0.13    |  |                                   |
|         | KO-FAS | 4.208 ± 0.688      |  | 1.29 ± 0.25    |  | <b>18:2_20:4</b> <b>16:0_22:6</b> |

PI continued

---

|         |        |        |   |        |      |   |      |                  |
|---------|--------|--------|---|--------|------|---|------|------------------|
| PI 40:6 | WT-FED | 44.849 | ± | 30.988 | 7.39 | ± | 3.9  |                  |
|         | KO-FED | 17.851 | ± | 8.722  | 4.63 | ± | 1.79 | <b>18:0_22:6</b> |
|         | WT-FAS | 18.382 | ± | 4.378  | 5.08 | ± | 1.01 | <b>18:0_22:6</b> |
|         | KO-FAS | 1.574  | ± | 0.917  | 0.49 | ± | 0.3  |                  |

---

**Supplementary Table IX.** Summary of PS species determined by LC-MS/MS in murine hepatocyte LDs from WT and ATGL-KO mice. Samples investigated are from WT-FED, KO- FED, WT-FAS and KO-FAS groups. Absolute amounts (n=3 animals) are calculated in nmol, and are normalized to gram total acylglycerols (Infinity™ Triglycerides Reagent kit). Corresponding ‰ values are relative to total amounts of PS species. Molecular species are derived from possible fatty acyl combinations as determined by fatty acid fragment ions (neutral losses) detected in the corresponding product ion spectra. Fatty acyls in bold are major compositions.

| Species |        | nmol / g |           | ‰      |         | Molecular species |                  |
|---------|--------|----------|-----------|--------|---------|-------------------|------------------|
| PS 36:4 | WT-FED | 52.367   | ± 8.573   | 35.03  | ± 7.63  | <b>16:0_20:4</b>  | <b>18:2/18:2</b> |
|         | KO-FED | 42.134   | ± 9.383   | 41.12  | ± 7.2   | <b>16:0_20:4</b>  | <b>18:2/18:2</b> |
|         | WT-FAS | 31.91    | ± 1.752   | 40.9   | ± 2.7   | <b>16:0_20:4</b>  | <b>18:2/18:2</b> |
|         | KO-FAS | 31.816   | ± 4.246   | 34.5   | ± 3.94  | <b>16:0_20:4</b>  | 18:2/18:2        |
| PS 38:4 | WT-FED | 833.81   | ± 123.246 | 550.92 | ± 24.42 | <b>18:0_20:4</b>  |                  |
|         | KO-FED | 591.885  | ± 113.477 | 574.32 | ± 30.83 | <b>18:0_20:4</b>  |                  |
|         | WT-FAS | 302.775  | ± 13.395  | 387.73 | ± 11.87 | <b>18:0_20:4</b>  |                  |
|         | KO-FAS | 560.185  | ± 53.156  | 607.03 | ± 15.6  | <b>18:0_20:4</b>  |                  |
| PS 38:5 | WT-FED | 7.849    | ± 1.71    | 5.55   | ± 1.19  |                   |                  |
|         | KO-FED | 6.922    | ± 2.771   | 7.24   | ± 4.34  |                   |                  |
|         | WT-FAS | 9.417    | ± 5.04    | 12.13  | ± 6.7   |                   |                  |
|         | KO-FAS | 4.426    | ± 1.332   | 4.99   | ± 1.33  |                   |                  |
| PS 38:6 | WT-FED | 100.835  | ± 13.46   | 66.75  | ± 4.52  | <b>16:0_22:6</b>  |                  |
|         | KO-FED | 75.413   | ± 20.658  | 72.83  | ± 10.06 | <b>16:0_22:6</b>  |                  |
|         | WT-FAS | 93.466   | ± 10.006  | 119.76 | ± 13.07 | <b>16:0_22:6</b>  |                  |
|         | KO-FAS | 49.763   | ± 5.77    | 54.16  | ± 7.39  | <b>16:0_22:6</b>  |                  |
| PS 40:6 | WT-FED | 514.582  | ± 42.593  | 341.74 | ± 19.62 |                   |                  |
|         | KO-FED | 313.073  | ± 60.042  | 304.5  | ± 22.79 |                   |                  |
|         | WT-FAS | 343.086  | ± 7.459   | 439.48 | ± 7.81  | <b>18:0_22:6</b>  |                  |
|         | KO-FAS | 275.804  | ± 18.308  | 299.32 | ± 7.96  |                   |                  |

**Supplementary Table X.** Summary of SM species determined by LC-MS/MS in murine hepatocyte LDs from WT and ATGL-KO mice. Samples investigated are from WT-FED, KO-FED, WT-FAS and KO-FAS groups. Absolute amounts (n=3 animals) are calculated in nmol, and are normalized to gram total acylglycerols (Infinity™ Triglycerides Reagent kit). Corresponding ‰ values are relative to total amounts of SM species. Sphingosine base assumed to be d18:1. n.d., not detected.

| Species |        |                  | nmol / g       |  | ‰ |  |
|---------|--------|------------------|----------------|--|---|--|
| SM 16:0 | WT-FED | 60.789 ± 3.54    | 91.98 ± 13.8   |  |   |  |
|         | KO-FED | 32.809 ± 7.974   | 85.48 ± 18.09  |  |   |  |
|         | WT-FAS | 34.253 ± 0.395   | 79.01 ± 3.47   |  |   |  |
|         | KO-FAS | 42.105 ± 1.598   | 122.97 ± 5.75  |  |   |  |
| SM 22:0 | WT-FED | 344.492 ± 90.109 | 507.49 ± 63.84 |  |   |  |
|         | KO-FED | 106.892 ± 25.735 | 275.15 ± 36.11 |  |   |  |
|         | WT-FAS | 162.715 ± 5.562  | 375.5 ± 25.37  |  |   |  |
|         | KO-FAS | 85.478 ± 5.934   | 249.41 ± 12.54 |  |   |  |
| SM 24:0 | WT-FED | n.d.             | n.d.           |  |   |  |
|         | KO-FED | 41.916 ± 6.205   | 111.48 ± 28.72 |  |   |  |
|         | WT-FAS | 63.732 ± 13.9    | 146.28 ± 27.83 |  |   |  |
|         | KO-FAS | 47.168 ± 6.451   | 137.31 ± 14.07 |  |   |  |
| SM 24:1 | WT-FED | 265.683 ± 22.771 | 400.54 ± 49.58 |  |   |  |
|         | KO-FED | 203.459 ± 33.297 | 527.89 ± 30.84 |  |   |  |
|         | WT-FAS | 173.118 ± 3.986  | 399.21 ± 16.03 |  |   |  |
|         | KO-FAS | 168.023 ± 8.159  | 490.31 ± 10.86 |  |   |  |
